# **A comparison of root and shoot hydraulics, aquaporin expression and leaf gas exchange between two grapevine cultivars reveals differences in hydraulic control mediated by aquaporins**

Silvina Dayer<sup>3\*</sup>, Johannes Daniel Scharwies<sup>1\*</sup>, Sunita Ramesh<sup>1</sup>, Wendy Sullivan<sup>1</sup>, Franziska Doerflinger<sup>2</sup>, Vinay Pagay<sup>2†#</sup> and Stephen D Tyerman<sup>1†</sup>

<sup>1</sup>Australian Research Council Centre of Excellence in Plant Energy Biology, Waite Research Institute, School of Agriculture Food and Wine, The University of Adelaide, Waite Campus, PMB 1, Glen Osmond, SA 5064, Australia

<sup>2</sup>School of Agriculture Food and Wine, Waite Research Institute, The University of Adelaide, Waite Campus, PMB 1, Glen Osmond, SA 5064, Australia

<sup>3</sup>Institut des Sciences de la Vigne et du Vin, Ecophysiologie et Génomique Fonctionnelle de la Vigne, UMR 1287, F-33140 Villenave d'Ornon, France

\*†These authors contributed equally.

#Corresponding Author

**Corresponding Author:** Vinay Pagay

*email: vinay.pagay@adelaide.edu.au*

## ABSTRACT

Hydraulics of plants that take different strategies of stomatal control under water stress are still relatively poorly understood. Here we explore how root and shoot hydraulics, gas exchange, aquaporin expression and abscisic acid (ABA) concentration in leaf xylem sap ( $[ABA]_{\text{xylem}}$ ) may be involved and coordinated. A comparison in responses to mild water stress and ABA application was made between two cultivars of *Vitis vinifera* L. previously classified as isohydric (Grenache) and anisohydric (Syrah). Grenache showed stronger adjustments of leaf, plant, and root hydraulic conductances to decreased soil moisture and a steeper correlation of stomatal conductance ( $g_s$ ) to  $[ABA]_{\text{xylem}}$  than Syrah resulting in greater conservation of soil moisture, but not necessarily more isohydric behaviour. Under well-watered conditions, changes in vapour pressure deficit (VPD) had a strong influence on  $g_s$  in both cultivars with adjustments of leaf hydraulic conductance. Grenache was more sensitive to decreases in soil water availability compared to Syrah that rather responded to VPD. There were stronger correlations between plant hydraulic parameters and changes in aquaporin gene expression in leaves and roots of Grenache. Overall, the results reinforce the hypothesis that both hydraulic and chemical signals significantly contribute to the differences in water conservation behaviours of the two cultivars.

## INTRODUCTION

To withstand abiotic stresses such as drought, plants have evolved complex adaptive mechanisms that are regulated in a dynamic fashion. There is an interplay between stomatal regulation of transpiration (Chaves *et al.*, 2010) and changes in the hydraulic conductivity of roots ( $L_{pr}$ ; Maurel *et al.* (2010)), and leaves ( $K_{leaf}$ ; Sack and Holbrook (2006)). The flux of water vapour through stomata, known as transpiration ( $E$ ), is strongly influenced by vapour pressure deficit (VPD; Aphalo and Jarvis (1991), McAdam and Brodribb (2016)) as well as changes in  $K_{leaf}$  (Pou *et al.*, 2013), through changes of stomatal guard cell turgor. Changes in guard cell turgor involve complex and still debated mechanisms that are mediated by chemical and/or hydraulic signals (Comstock, 2002). It is well established that under soil and/or atmospheric water deficit (WD, i.e. soil drying or high VPD), roots and shoots synthesize abscisic acid (ABA), a plant growth regulator that is translocated to the leaf via the transpiration stream and reaches the guard cells where it induces stomatal closure (Dodd, 2005, Tardieu & Simonneau, 1998). Even though ABA signalling is seen as the main pathway for stomatal regulation, chemical signals other than ABA have been proposed to contribute significantly (Christmann *et al.*, 2007, Wilkinson *et al.*, 2007) including the recently reported  $\gamma$ -aminobutyric acid (GABA; Mekonnen *et al.* (2016)). Christmann *et al.* (2007) demonstrated in *Arabidopsis thaliana* that changes in turgor pressure of leaf mesophyll cells occurred within minutes of root-induced osmotic stress and elicited activation of ABA biosynthesis and signalling required for stomatal closure. These observations support a role of ABA in stomatal closure but call into question whether it acts as the sole primary-long distance signal of water stress.

Hydraulic mediation of stomatal closure has been observed in studies where large diurnal fluctuations of stomatal conductance ( $g_s$ ) and leaf water potential ( $\Psi_{leaf}$ ) were observed without substantial changes in the soil water content (Salleo *et al.*, 2000). The co-variation of  $g_s$  and  $\Psi_{leaf}$  has been interpreted as a mechanism to protect the plant from severe dehydration and consequently, xylem cavitation and loss of hydraulic conductivity (Tyree & Sperry, 1989). Other studies have suggested the presence of hydraulic signals based on positive correlations between  $K_{leaf}$  and  $g_s$  at a relatively constant  $\Psi_{leaf}$  (Nardini *et al.*,

2001). Evidence for the involvement of a hydraulic root-to-shoot signal has been provided by experiments where wild-type tomato plants were grafted on ABA-deficient roots (Holbrook *et al.*, 2002). Despite the inability of the roots to produce ABA, stomata still showed the wild-type response to WD. Recent studies in grapevine suggested that  $g_s$  was regulated to a greater degree by hydraulic rather than chemical signals during the early phases of WD, while ABA seemed to have an additive effect involved in the long-term maintenance of stomatal closure under prolonged WD (Tombesi *et al.*, 2015). According to these studies, the involvement of both hydraulic and chemical signals seems to be a more likely explanation in the regulation of  $g_s$  under WD.

Aquaporins (AQPs), cellular membrane-bound water channel proteins and members of the major intrinsic protein (MIP) family, have been shown to play a key role in the transcellular or radial flow of water in both leaves and roots (Chaumont & Tyerman, 2014, Steudle, 2000). AQPs are known to be regulated by cytoplasmic pH, divalent cations, and phosphorylation (Li *et al.*, 2015, Tornroth-Horsefield *et al.*, 2006, Tournaire-Roux *et al.*, 2003). In certain species, the transcellular path is a major contributor to  $K_{leaf}$  (Prado & Maurel, 2013). Rapid and reversible changes in  $K_{leaf}$  involving AQPs have been observed under fluctuating environmental conditions such as radiation (Prado *et al.*, 2013), WD (Galmes *et al.*, 2007) and in response to exogenous application of ABA (Pantin *et al.*, 2013, Shatil-Cohen *et al.*, 2011). For example in grapevine,  $K_{leaf}$  decreased by about 30% under water stress concomitantly with a decrease of expression of some plasma membrane intrinsic protein (PIP) and tonoplast intrinsic protein (TIP) AQP isoforms (Pou *et al.*, 2013). Furthermore, these authors found significant positive correlations between  $g_s$ ,  $K_{leaf}$  and leaf AQP expression, suggesting a contribution of AQPs in regulating the flow of water. In *Arabidopsis*, xylem-fed ABA reduced  $K_{leaf}$  by specifically decreasing the water permeability of vascular bundle sheath cells, putatively through inactivation of PIPs (Shatil-Cohen *et al.*, 2011). In line with that study, Pantin *et al.* (2013) confirmed those observations and proposed a model in which ABA close stomata via its already known chemical effect on guard cells (Tardieu & Simonneau, 1998), but also via an indirect hydraulic action through a decrease in leaf water permeability triggered within vascular tissues

(Pantin *et al.*, 2013). According to these findings, the hydraulic signal induced by ABA may be an important component in the mechanisms used by different species to regulate  $g_s$  under WD.

In addition to  $g_s$  and  $K_{leaf}$  variations, responses to drought include changes in root hydraulic conductivity ( $Lp_r$ ). In contrast to the commonly observed reduction in  $K_{leaf}$ , ABA application and WD have usually opposite effects on  $Lp_r$ : while water stress reduces  $Lp_r$ , most studies have reported increased  $Lp_r$  with ABA (Aroca *et al.*, 2006, Parent *et al.*, 2009, Thompson *et al.*, 2007). The increase in  $Lp_r$  by ABA can be interpreted as a mechanism to improve the water supply to the shoot, helping to maintain the water continuum in the plant under soil or atmospheric WD (Kudoyarova *et al.*, 2011, Pantin *et al.*, 2013). Diurnal changes in  $Lp_r$  have been observed under well-watered conditions concomitantly with changes in shoot transpiration (Vandeleur *et al.*, 2009). In general, these variations correlate with the transcript abundance of root AQPs suggesting that water transport across roots is regulated by AQPs to meet the transpirational demand of the shoots (Laur & Hacke, 2013, Sakurai-Ishikawa *et al.*, 2011, Vandeleur *et al.*, 2014). Accordingly, these studies support the hypothesis of shoot-to-root (chemical and/or hydraulic) signalling via the xylem that regulates  $Lp_r$  in response to  $E$  and that is modulated by AQPs (Vandeleur *et al.*, 2014). Positive correlations between  $Lp_r$ ,  $g_s$  and  $E$  have also been observed in grapevines exposed to exogenous ABA applications through the soil suggesting a connection between ABA-mediated root and leaf conductances (DeGaris, 2016).

The hydraulic and chemical (ABA-mediated) mechanisms, described above, that operate between roots and leaves to control  $g_s$  are particularly important in understanding the contrasting behaviours reflecting more isohydric or anisohydric strategies of various species and even cultivars (varieties or sub-species) to cope with WD (Pantin *et al.*, 2013). In isohydric plants,  $\Psi_{leaf}$  is maintained relatively constant under declining soil moisture availability through a tight regulation of  $g_s$  (Tardieu & Simonneau, 1998). This behaviour has been reported to confer an advantage of increased drought tolerance (Schultz, 2003) and is thought to be under hydraulic and chemical (ABA) control (Tardieu & Simonneau, 1998). In contrast, anisohydric plants maintain  $g_s$  to prioritize photosynthesis, which is related to a more variable  $\Psi_{leaf}$

(Tardieu & Simonneau, 1998). This behaviour has been previously reported to operate under chemical control (Tardieu *et al.*, 1996).

The present study aimed to elucidate how the hydraulic behavior, gas exchange and aquaporin expression in two grapevine cultivars previously classified as near-isohydric (Grenache) and anisohydric (Syrah) (Shultz, 2003) differed in their responses to progressive WD, recovery from WD, and exogenous ABA application to roots. We hypothesized that, under increasing WD or exogenous ABA application, the more isohydric Grenache would decrease  $Lp_r$  concomitantly with  $g_s$  and  $K_{leaf}$  to maintain homeostasis of  $\Psi_{leaf}$  mediated by a down-regulation of leaf and root AQPs. In contrast, the relatively anisohydric Syrah should maintain  $Lp_r$  under increasing WD through an up-regulation of root AQPs in order to maintain homeostasis of  $g_s$  and  $K_{leaf}$  but not  $\Psi_{leaf}$ .

## MATERIALS AND METHODS

### Experimental site and plant material

The experiments were carried out in 2015 and 2016 at The Plant Accelerator®, University of Adelaide, Waite Campus located in Urrbrae (Adelaide), South Australia (34° 58' 17" S, 138° 38' 23" E). One-year-old rootlings of own rooted grapevines (*Vitis vinifera* L.) cvs. Grenache and Syrah were planted in 4.5 L pots containing a mixture of 50 % vermiculite and perlite and 50 % of UC soil mix (61.5 L sand, 38.5 L peat moss, 50 g calcium hydroxide, 90 g calcium carbonate and 100 g Nitrophoska® (12:5:1, N:P:K plus trace elements; Incitec Pivot Fertilisers, Southbank, Vic., Australia) per 100 L at pH 6.8. Plants were grown for two months in a temperature-controlled glasshouse (day/night: approx. 25/20 °C) and irrigated to field capacity every three days from December 21<sup>st</sup> 2015. The vines were pruned to two shoots 10 days after bud burst (January 10<sup>th</sup>, 2016) and oriented upright during their development using wooden stakes. A liquid soil fertiliser (Megamix 13:10:15 N:P:K plus trace elements; Rutec, Tamworth, Australia) at a concentration of 1.6 mL L<sup>-1</sup> was applied as required to bring all plants to approximately equal size. The fertiliser was applied weekly for three weeks once the plants had developed the first adult leaves. On the 25<sup>th</sup> February 2016, all vines were moved from the greenhouse and transferred to a DroughtSpotter (Phenospex, Netherlands) automated gravimetric watering platform where individual pots were automatically weighed continuously (15 min intervals) and watered twice daily (0600 h, 1600 h) based on the plant weight loss by transpiration. All plants were irrigated to their field capacity weights (determined the previous days) daily until the start of the experiment. Day and night temperatures in the DroughtSpotter glasshouse were kept at 25/20 °C, respectively.

### Treatments

Grenache and Syrah vines were used to examine the effects of water deficit (WD) and recovery by re-watering (REC) on stomatal conductance ( $g_s$ ) and root hydraulic conductivity ( $Lp_r$ ; normalized to root dry weight). A set of vines were kept as control (well-watered; WW), irrigated to field capacity and weight to

replace the amount of water consumed by transpiration daily. Water deficit was imposed by reducing the amount of irrigation until a defined value of leaf maximum daily  $g_s$  of approx.  $50 \text{ mmol H}_2\text{O m}^{-2} \text{ s}^{-1}$  (Medrano *et al.*, 2002) was reached. After maintaining  $g_s$  at about  $50 \text{ mmol m}^{-2} \text{ s}^{-1}$  for three days, vines were rehydrated by irrigating the pots to field capacity and recovery from water stress was examined after seven days. An additional treatment consisting of an exogenous application of ABA was simultaneously carried out on a separate set of vines from both cultivars. In this treatment, the vines were root-fed by applying  $50 \mu\text{M}$  of ABA (Valent Biosciences Corporation, Libertyville, IL, USA) daily to the root system concurrently with irrigation. The selected concentration of ABA application was based on prior experiments, which showed that  $50 \mu\text{M}$  of ABA applied to the root system of potted vines is required to have a significant effect on  $g_s$  (DeGaris *et al.*, 2015). All the pots were covered with a thick layer of perlite to minimize soil water loss through evaporation.

The night before each measurement day, selected vines from each treatment were moved from the DroughtSpotter glasshouse to an adjacent glasshouse with identical environmental conditions for physiological measurements and tissue sampling for gene expression analysis. The measurement days were: i) well-watered (WW) vines only on the day before the experiment commenced (Day 0); ii) WW and WD vines the day water deficit and ABA treatments achieved a  $g_s$  of  $\sim 50 \text{ mmol H}_2\text{O m}^{-2} \text{ s}^{-1}$  (Day 5); iii) WW, WD, and ABA vines three days after  $g_s$  reached  $\sim 50 \text{ mmol H}_2\text{O m}^{-2} \text{ s}^{-1}$  and was held constant in WD and ABA vines (Day 7); and, iv) WW and REC vines seven days after rewatering was performed in REC vines (Day 14). At each time point, three to five WW vines were used as 'controls' to compare against the specific treatment(s).

## **Physiological measurements**

### ***Leaf gas exchange***

In order to track  $g_s$  and establish the desired stress level in WD and ABA treatments, daily measurements of  $g_s$  were performed in all vines on the DroughtSpotter platform on fully-expanded leaves (estimated minimum leaf age: Leaf Plastochron Index, LPI >10) in the basal section of the shoots using a porometer



(SC-1, Decagon Devices, Pullman, WA, USA). Measurements were performed every day at mid-morning (10:30-11:30 h) on two leaves per treatment and replicate.

On the specific sampling dates,  $g_s$  and transpiration ( $E$ ) were measured concomitantly with the rest of physiological measurements between 10:00 and 11:00 h. Measurements were performed on two fully-expanded, healthy leaves using an open system infrared gas analyzer (LI-6400XT, LI-COR Biosciences Inc., Lincoln, NE, USA) with a 6 cm<sup>2</sup> cuvette. An external LED light source (LI-6400-02B) attached to the cuvette was used at a fixed PAR value of 1500  $\mu\text{mol m}^{-2} \text{s}^{-1}$  due to the non-saturating light levels in the glasshouse for photosynthesis (approx. 200  $\mu\text{mol m}^{-2} \text{s}^{-1}$ ). After gas exchange measurements were performed, the same leaf was excised to determine  $\Psi_{\text{leaf}}$ .

### ***Leaf water potential and sap collection for ABA analysis***

Predawn, leaf and stem water potentials were measured on adult, primary leaves of vines on the specific sampling dates. Predawn leaf water potential ( $\Psi_{\text{PD}}$ ) was measured before sunrise (04:00-05:00 h), and leaf ( $\Psi_{\text{leaf}}$ ) and stem ( $\Psi_{\text{stem}}$ ) water potentials around midday (11:00-12:00 h). Stem water potential was measured after leaves had been sealed in aluminum foil and plastic bags for two hours, to allow equilibration of water potentials. One leaf per plant was measured from three to five plants per group using a Scholander-type pressure chamber (PMS Instruments Co, Albany, OR, USA).

After recording leaf water potential values, an overpressure of 0.5 MPa was applied to the encapsulated leaf for xylem sap collection (approx. 35  $\mu\text{L}$ ). Sap was collected from the cut surface of the protruding petiole using a micropipette and transferred to a pre-weighed and labelled micro tube before snap freezing in liquid nitrogen. Samples were stored at -80 °C until subsequent analysis of ABA.

### ***ABA analysis of xylem sap***

ABA concentration in xylem sap samples ( $[\text{ABA}]_{\text{xylem}}$ ) was analysed as described in (Speirs *et al.*, 2013). Briefly, the volume of each sample was measured using a pipette for normalisation. Each sample was mixed with 30  $\mu\text{L}$  of deuterated standard (Plant Biotechnology Institute, Saskatoon, SK, Canada)

containing deuterium-labelled analogues of ABA, phaseic acid (PA), dihydrophaseic acid (DPA) and the glucose ester of ABA (ABA-GE) at a concentration of 100 ng mL<sup>-1</sup> each. Solids were precipitated in a centrifuge at 12,470 × g for 5 min. From each sample, 20 µL supernatant was transferred to a LC/MS tube and analysed by liquid chromatography/mass spectrometry (Agilent 6410 Triplequadropole LC-MS/MS with Agilent 1200 series HPLC, Agilent Technologies Inc. Santa Clara, USA). A Phenomenex C18(2) column (75 mm × 4.5 mm × 5 µm; Phenomenex, Torrance, CA, USA) was used at 40 °C and samples were eluted with a 15 min linear gradient of 10 % to 90 % acetonitrile. Nanopure water and acetonitrile were both mixed with 0.05% acetic acid. Compounds were identified by retention times and mass/charge ratio.

### ***Hydraulic conductance of leaves, plant and roots***

Leaf and whole plant hydraulic conductance ( $K_{\text{leaf}}$  and  $K_{\text{plant}}$ ) were determined using the evaporative flux method (Flexas *et al.*, 2013). This measurement is based on the relationship between the driving leaf transpiration rate ( $E$ ) and the water potential gradient ( $\Delta\Psi$ ) when leaf water potential reaches a steady state. In this case hydraulic conductance is calculated as follows:  $K_{\text{leaf}}=E/(\Psi_{\text{stem}}-\Psi_{\text{leaf}})$  and  $K_{\text{plant}}=E/(\Psi_{\text{PD}}-\Psi_{\text{leaf}})$ .

The hydraulic conductance of the entire root system was measured for the same plants using a High Pressure Flow Meter (Dynamax, Houston, TX, USA) as previously described in Vandeleur *et al.* (2009). This is a destructive technique whereby the stem of the vine is cut above the soil surface, covered with filtered deionized water and the stump connected to the High Pressure Flow Meter with a water-tight seal as quickly as possible, typically within 1 min. A transient ramp in pressure with simultaneous recording of flow rate was used to calculate hydraulic conductance, which was normalized by dividing by total root dry weight to obtain root hydraulic conductivity ( $Lp_r$ ). All measurements were conducted with 5 minutes of shoot excision. The soil was washed from the roots before drying at 60 °C for more than 48 h prior to weighing.

### ***AQPs expression in roots and leaves***

Samples of leaves and roots were collected from vines immediately after physiological measurements for subsequent analysis of AQP transcript abundance by quantitative reverse transcription PCR (RT-qPCR). Leaves were immediately immersed in liquid nitrogen and stored at -80 °C until analysis. Roots were carefully selected from the bottom and upper parts of the pot in order to get the thinner, white and more functional roots. The root samples were quickly washed to remove soil particles and dried with tissue paper before being submerged in liquid nitrogen.

Leaf and root material was ground to a fine powder in liquid nitrogen using a mortar and pestle. For leaves, total RNA was extracted from 100 mg of fine frozen powder using the Spectrum Plant Total RNA extraction Kit (Sigma-Aldrich, St. Louis, MO, USA). DNA contamination was avoided by digestion with the On-Column DNase I Digestion Set (Sigma-Aldrich, St. Louis, MO, USA) during RNA extraction according to manufacturer recommendations. For roots, RNA extractions were performed as described by Vandeleur et al. (2014). RNA was extracted from 200 mg of fine frozen powder with a 20 mL sodium perchlorate extraction buffer (5 M sodium perchlorate, 0.2 M Tris pH 8.3, 8.5 % (w/v) polyvinylpyrrolidone, 2 % PEG 6000, 1 % (w/v) SDS, 1 % (v/v)  $\beta$ -mercapto-ethanol) for 30 min at room temperature. The lysate was filtered through a glass wool filter and mixed with 30 mL of cold absolute ethanol before precipitation at -20 °C overnight. After centrifugation at 3500 rpm for 20 min at 4 °C, the pellets were washed with cold ethanol and purified using the Spectrum Plant Total RNA Extraction Kit with on-column DNase digestion as described for leaves. Concentration and purity of total RNA were determined on a NanoDrop™ 1000 Spectrophotometer (Thermo Fisher Scientific Inc., MA, USA). Agarose gel electrophoresis (1.2 % agarose) was done to visualize the integrity of RNA.

For cDNA synthesis, 1  $\mu$ g of total RNA was reverse transcribed using iScript™ cDNA Synthesis Kit for RT-qPCR (Bio-Rad, CA, USA) according to manufacturer instructions.

Gene expression analysis was carried out by quantitative reverse transcription PCR (RT-PCR) (QuantStudio™ 12K Flex; ThermoFisher Scientific Inc., MA, USA). For standard curves, 1:10 serial dilutions of purified PCR products were made in the range of 10<sup>6</sup> to 10 copies/reaction. RT-qPCR was performed in a 10 µL reaction volume containing 1 µL of either the serial dilution or undiluted cDNA, 5 µL KAPA SYBR® FAST Master Mix (2X) Universal (Kapa Biosystems Inc., MA, USA), 100 nM of gene-specific primers, and 0.2 µL of ROX Reference Dye Low (50X). The thermal cycling conditions were: one cycle of 3 min at 95 °C followed by 40 cycles of 16 s at 95 °C and 20 s at 60 °C. Subsequently, melting curves were recorded from 60 to 95 °C at a ramp rate of 0.05 °C/s. Normalized relative quantities (NRQ) of gene expression were calculated between the gene of interest (goi) and two reference genes (*ELF*, *GAPDH*) taking differences in PCR efficiency ( $E^{Ct}$ ) into account (Hellemans *et al.*, 2007, Pfaffl, 2001):

$$NRQ = \frac{E_{goi}^{Ct,goi}}{\sqrt{E_{ELF}^{Ct,ELF} * E_{GAPDH}^{Ct,GAPDH}}} \quad (1)$$

Overall, a mean NRQ value and standard error were calculated from five independent biological replicates. The absence of non-specific products was confirmed by analysis of the melt curves. Sequences for the gene-specific primers were used from Tashiro *et al.* (2016) (*GAPDH*) and Shelden (2008) (*ELF*, *PIP1;1*, *PIP2;2*, *PIP2;3*, *TIP1;1*) or designed using NCBI Primer-Blast (Ye *et al.*, 2012) for *PIP2;1* and *TIP2;1* (Supplementary Table 1). Log<sub>2</sub> ratios for the heatmap were calculated between the mean NRQ of the WW controls and the mean NRQ of WD, ABA or REC.

### **Statistical Analyses**

Analysis of variance (ANOVA) was performed using Infostat software (version 1.5; National University of Córdoba, Córdoba, Argentina). The means were compared using Fisher's multiple range test ( $p \leq 0.05$ ) when appropriate, and significant interactions between treatments are indicated and described in the text. Pearson correlation coefficients and multiple linear regressions were calculated in the statistical language

R (R Core Team, 2017). Correlation maps were constructed using the R package *corrplot* (Wei and Simko, 2016). Only correlations which were significant at  $p \leq 0.05$  are shown in the correlation maps. Linear regressions and Mann-Whitney test were performed using GraphPad Prism version 7.00 for Windows (GraphPad Software, La Jolla California USA). Figures, except correlation maps, were created in GraphPad Prism.

## RESULTS

### Water relations of mild water deficit and ABA watered vines

Potted vines of Grenache and Syrah were subjected to four different treatments on the DroughtSpotter platform and  $g_s$  was monitored using a porometer. Well-watered (WW) vines were maintained at a constant soil water content for maximum  $g_s$  (Fig. 1); mild water deficit vines (WD) were not watered until  $g_s$  reached approx.  $50 \text{ mmol H}_2\text{O m}^{-2} \text{ s}^{-1}$  (Fig. 1a, Day 4), after which the same deficit was maintained for two more days (Fig. 1b, Day 6); ABA watered (ABA) vines that were watered with  $50 \mu\text{M}$  ABA solution until  $g_s$  reached approx.  $50 \text{ mmol H}_2\text{O m}^{-2} \text{ s}^{-1}$  as well (Fig. 1b, Day 6); and, recovery (REC) vines originated from the WD treatment that were re-watered after Day 6 to WW levels (Fig. 1c, Day 13).

Due to significant differences in vapour pressure deficit (VPD) between sampling days when physiological measurements were made (Supporting Information Fig. S1),  $g_s$  measured by infrared gas analysis (IRGA) varied somewhat, therefore  $g_s$  was calculated for the treatments WD, ABA, and REC relative to the WW controls on the same days (Fig. 2a-c). The WD vines of Grenache showed a significantly larger reduction in  $g_s$  compared to Syrah on Day 5 (Fig. 2a), while no differences in soil and plant water status ( $\Psi_{\text{PD}}$ ,  $\Psi_{\text{leaf}}$ ,  $\Psi_{\text{stem}}$ ) were observed between WD vines of both cultivars (Fig. 2d,g,j). However, significantly lower  $\Psi_{\text{PD}}$ ,  $\Psi_{\text{leaf}}$ , and  $\Psi_{\text{stem}}$  were measured in WD vines of both cultivars compared to WW vines. A range of  $\Psi_{\text{PD}}$ , which is an estimate of soil water potential, from  $-0.2$  to  $-0.5$  MPa was measured in WD vines for days 5 and 7 (Fig. 2d,e). On Day 7, WD vines from both cultivars showed a similar reduction of  $g_s$  relative to WW plants after being exposed to the same deficit for 3 days (Fig. 2b), however a significantly lower  $\Psi_{\text{PD}}$  was measured for WD vines of Syrah compared to Grenache. At the same time, WD vines of Syrah also had a lower  $\Psi_{\text{leaf}}$  compared to Grenache, while  $\Psi_{\text{stem}}$  was not significantly different (Fig. 2h,k). The ABA vines, which had a  $g_s$  of approximately  $50 \text{ mmol m}^{-2} \text{ s}^{-1}$  on Day 6 (Fig. 1b) and were not significantly different from the WD vines, showed a significantly larger reduction of  $g_s$  relative to the WW and WD vines on Day 7 (Fig. 2b). ABA-treated Grenache vines had significantly lower relative  $g_s$  compared to ABA-treated vines of Syrah. Despite adequate soil moisture, similar to the WW vines (Fig. 1e), ABA-treated vines of both

cultivars had a similar  $\Psi_{\text{leaf}}$  and  $\Psi_{\text{stem}}$  to that of WD vines (Fig. 2h,k). When WD vines were recovered (REC) for seven days, they showed no significant differences in vine water status compared to the WW vines (Fig. 2c,i,l).

### Correlations between physiological parameters and aquaporin gene expression

The statistical relationship between the measured plant physiological parameters and gene expression of selected aquaporins is shown in the split correlogram for WW vines in Fig. 3a and for the combination of WW and WD vines in Fig. 3b. The data for Grenache are shown in the upper triangle and data for Syrah are shown in the lower triangle of each correlogram divided by a black diagonal line. Specific categories of columns (col) are labelled along the bottom (A to F) and rows (row) on the right hand side (1 to 6) to enable reference (e.g. col A, row 1) to relevant sets of correlations.

Since environmental conditions, like vapour pressure deficit (VPD, Supporting Information Fig. S1) changed significantly between different days of the experiment, measurements on WW vines were also variable. A correlogram for WW vines only (Fig. 3a) was used to explore the primary sources and effects of this variability in the data, by excluding all other treatments. Within the recorded physiological parameters (upper left black box), some were significantly correlated to  $VPD_{\text{leaf}}$ . Gas exchange parameters,  $g_s$  and  $E$ , were positively correlated to  $VPD_{\text{leaf}}$  for well-watered vines in both cultivars (col A, row 6, Fig. 3a). Additionally,  $K_{\text{leaf}}$  and  $K_{\text{plant}}$  were positively correlated to  $VPD_{\text{leaf}}$  for well-watered vines of Grenache (col D, row 6, Fig. 3a) but not for  $K_{\text{plant}}$  in Syrah (col A, row 3). No significant correlation was found between root hydraulic conductance ( $Lp_r$ ), and  $VPD_{\text{leaf}}$ . Also, expression of some AQP genes was correlated to  $VPD_{\text{leaf}}$ . Gene expression of *PIP2;2* in roots was positively correlated to  $VPD_{\text{leaf}}$  in well-watered vines of Grenache (col F, row 6), while in well-watered vines of Syrah, *PIP2;3* in leaves and *PIP1;1* in roots were negatively and positively correlated to  $VPD_{\text{leaf}}$ , respectively (col A, rows 2,1). While  $g_s$  and  $E$  increased with increasing  $VPD_{\text{leaf}}$  for both cultivars, only Syrah showed negative correlations with  $\Psi_{\text{leaf}}$  and  $\Psi_{\text{stem}}$  (col A, row 4; Fig. 3a). ABA concentration in the xylem of leaves from well-watered plants ( $[ABA]_{\text{xylem}}$ ) showed very few significant correlations to other parameters in general (col B and row

5, Fig. 3a). None of the gas exchange and hydraulic conductance parameters correlated to xylem ABA concentration  $[ABA]_{\text{xylem}}$ , however  $[ABA]_{\text{xylem}}$  of WW vines from Grenache ( $143.5 \pm 25.26 \text{ ng mL}^{-1}$ ,  $n = 13$ ) was higher ( $P = 0.0019$ ) compared to leaves of WW vines from Syrah ( $43.77 \pm 3.731 \text{ ng mL}^{-1}$ ,  $n = 11$ ). Data from WW and WD vines were combined and a second correlogram was developed to investigate the relationships between plant physiological parameters and root and leaf AQP gene expression during the transition from well-watered to water deficit conditions (Fig. 3b). In contrast to WW vines only,  $g_s$  was not significantly correlated to  $VPD_{\text{leaf}}$  for both cultivars once data of WD vines were included, but negative correlations were observed to  $[ABA]_{\text{xylem}}$  (col A, row 5 and col B, row 6; Fig. 3b). This correlation was stronger in Grenache where  $g_s$  also correlated with  $\Psi_{\text{PD}}$  and  $\Psi_{\text{stem}}$  (col C, row 6, Fig. 3b) unlike Syrah.  $VPD_{\text{leaf}}$  correlated positively to  $E$  only in Syrah but not in Grenache.  $K_{\text{leaf}}$  and  $K_{\text{plant}}$  (col D row 6, Fig. 3b) also showed correlations to  $g_s$  and  $E$  in the cultivar Grenache. While  $K_{\text{leaf}}$  was not correlated to  $[ABA]_{\text{xylem}}$  in both cultivars,  $K_{\text{plant}}$  ( $r = -0.60$ ,  $P = 0.005$ ) was negatively correlated to  $[ABA]_{\text{xylem}}$  for both cultivars (col D row 5 & col B row 3, Fig. 3b).  $Lp_r$  was positively correlated with  $E$ ,  $g_s$ ,  $\Psi_{\text{leaf}}$  and  $\Psi_{\text{stem}}$  only for Grenache where it was also negatively correlated to  $[ABA]_{\text{xylem}}$  (col D, rows 3-6).

The expression of AQPs showed different patterns between the two cultivars (compare top right quadrant for Grenache (cols E-F, rows 3-6) with bottom left quadrant for Syrah (cols A-D, rows 1-2, Fig. 3b). Notable differences are: the absence of negative correlations between leaf *TIP1;1* and gas exchange parameters in Grenache compared to Syrah (col A, row 2) and the absence of positive correlations between leaf *TIP2;1* and  $g_s$  and  $E$  in Syrah compared to Grenache (col E row 6). However, leaf *TIP2;1* in Syrah was more positively correlated with  $\Psi_{\text{leaf}}$  (col C row 2). In Grenache, expression of leaf *PIP2;2* was positively correlated to  $E$ , water potentials and  $K_{\text{plant}}$  (col E rows 3-6), while for Syrah positive correlations with  $g_s$ ,  $E$ ,  $K_{\text{leaf}}$  and  $K_{\text{plant}}$  (cols A-D row 2) were observed.

The two most highly expressed aquaporins in roots (*PIP1;1* and *PIP2;2*) also showed differences between the two cultivars (cols A-D row 1 and col F rows 3-6). Root *PIP1;1* for Grenache was positively correlated with  $g_s$ ,  $E$  and  $K_{\text{plant}}$  while Syrah showed no significant correlations for these parameters. Similar to leaves,



expression of *PIP2;2* in roots of Grenache was positively correlated to  $g_s$  and  $E$ , water potentials and  $K_{\text{plant}}$  (col F rows 3-6), but not to  $Lp_r$ . In Syrah these were notably absent except for a positive correlation with  $\Psi_{\text{PD}}$ . Root *TIP2;1* showed positive correlations to  $g_s$ ,  $E$ ,  $\Psi_{\text{stem}}$  and  $K_{\text{plant}}$  in Grenache, but only positive correlations to water potentials in Syrah (similar to leaf *TIP2;1*). In both cultivars, root *PIP2;2* and *TIP2;1* were negatively correlated to  $[\text{ABA}]_{\text{xylem}}$  (col B row 1 and col F row 5). Interestingly, no significant correlations were found between any aquaporins and  $Lp_r$ .

### Influence of changes in VPD on well-watered vines

A closer examination of the correlation between  $g_s$  and  $\text{VPD}_{\text{leaf}}$  (Fig. 3a) in WW vines of Grenache ( $r = 0.57$ ,  $P = 0.034$ ) and Syrah ( $r = 0.56$ ,  $P = 0.036$ ) revealed a similar response of increasing  $g_s$  with increasing VPD in the range of 2 to 3 kPa, but significantly higher  $g_s$  in Grenache compared to Syrah (Fig. 4).

While the correlogram for WW vines (Fig. 3a) showed that  $K_{\text{leaf}}$  was only positively correlated to  $E$  in the cultivar Grenache, linear regressions show that data from both Grenache and Syrah fall on the same line (Fig. 5). The correlation between  $K_{\text{leaf}}$  and  $E$  is just short of being significantly positive ( $P = 0.052$ ). Grenache had a significantly higher  $K_{\text{leaf}}$  relative to Syrah under well-watered conditions (Fig.5 inset).

Similar to  $K_{\text{leaf}}$ , significantly higher  $K_{\text{plant}}$  were measured for the cultivar Grenache, compared to Syrah (Gr.:  $18.5 \pm 2.2 \text{ mmol MPa}^{-1} \text{ m}^{-2} \text{ s}^{-1}$ ,  $n = 14$ ; Sy.:  $11.1 \pm 1.0 \text{ mmol MPa}^{-1} \text{ m}^{-2} \text{ s}^{-1}$ ,  $n = 14$ ;  $P = 0.0058$ ) and  $Lp_r$  (Gr.:  $7.3 \times 10^{-6} \pm 1.0 \times 10^{-6} \text{ kg s}^{-1} \text{ MPa}^{-1} \text{ g}^{-1}$ ,  $n = 11$ ; Sy.:  $1.7 \times 10^{-6} \pm 5.3 \times 10^{-7} \text{ kg s}^{-1} \text{ MPa}^{-1} \text{ g}^{-1}$ ,  $n = 12$ ;  $P = 0.0002$ ). Correlations between  $E$  and  $K_{\text{plant}}$  were not significant at  $P \leq 0.05$ , but correlation coefficients were positive for both Grenache ( $r = 0.50$ ,  $P = 0.067$ ), which was close to being significant, and Syrah ( $r = 0.37$ ,  $P = 0.194$ ). The correlations between  $E$  and  $Lp_r$  were also not significant at  $P \leq 0.05$ , but for Grenache ( $r = 0.51$ ,  $P = 0.108$ ) a positive correlation coefficient was found, while for Syrah ( $r = 0.08$ ,  $p = 0.796$ ) the correlation coefficient was close to zero. The water potential gradient between stem and leaf ( $\Psi_{\text{stem}} - \Psi_{\text{leaf}}$ ) did not show any significant change in well-watered vines of both cultivars in relation to changes in  $E$  ( $r < 0.15$ ,  $P > 0.6$ ).

## Effects of mild water deficit and ABA treatment in Grenache and Syrah

A multiple linear regression model developed for each cultivar indicated that in Grenache, the soil water availability, given by  $\Psi_{PD}$ , is the main factor that explains changes in  $g_s$  and overrides any effect of changes in  $VPD_{leaf}$ . In contrast, changes in  $g_s$  in Syrah are primarily explained by  $VPD_{leaf}$  (Table 1).

In Grenache,  $g_s$  significantly decreased ( $P = 0.004$ ) when  $\Psi_{PD}$  dropped from approx. -0.1 MPa to -0.5 MPa, while no significant change of  $g_s$  was observed in Syrah (Fig. 6a). However, in both cultivars  $\Psi_{leaf}$  declined significantly (Grenache:  $P = 0.002$ ; Syrah:  $P = 0.018$ ) in response to decreasing  $\Psi_{PD}$  (Fig. 6b). Simple linear regressions showed that the relationship between  $\Psi_{PD}$  and  $\Psi_{leaf}$  was similar for both cultivars with a slope  $> 1$ . Likewise,  $\Psi_{PD}$  and  $\Psi_{leaf}$  measured on field grown well-watered and droughted Grenache and Syrah by Schultz (2003) also showed the same relationship with a slope of 0.7 (Supporting Information Fig. S2).

The two cultivars were compared for the relationship between  $g_s$  and  $[ABA]_{xylem}$  in Fig. 7. The decline in  $g_s$  with increasing  $[ABA]_{xylem}$  for Syrah was significantly ( $P = 0.0005$ ) lower than that for Grenache. Note the logarithmic transformation for  $[ABA]_{xylem}$  indicating that the relationship is not linear but exponential. Vines that were treated with ABA instead of water deficit, showed the same relationship between  $[ABA]_{xylem}$  of leaves and  $g_s$  for both cultivars, and these data are included as squared symbols in Fig. 7. The slopes of the linear regression lines were very similar for data from well-watered and water deficit vines (Grenache:  $-150.3 \pm 26.2$  mmol H<sub>2</sub>O m<sup>-2</sup> s<sup>-1</sup> ng<sup>-1</sup> mL; Syrah:  $-45.6 \pm 22.2$  mmol MPa<sup>-1</sup> m<sup>-2</sup> s<sup>-1</sup> ng<sup>-1</sup> mL) and additionally with data from ABA treated vines included (Grenache:  $-166.4 \pm 23.9$  mmol H<sub>2</sub>O m<sup>-2</sup> s<sup>-1</sup> ng<sup>-1</sup> mL; Syrah:  $-53.3 \pm 18.3$  mmol H<sub>2</sub>O m<sup>-2</sup> s<sup>-1</sup> ng<sup>-1</sup> mL).

Simple linear regressions showed that  $K_{leaf}$  and  $K_{plant}$  changed similarly in Grenache and Syrah in response to changes in  $E$  (Fig. 8a,b). ABA treatment (squared symbols) caused a similar response in  $K_{leaf}$ ,  $K_{plant}$ , and  $E$  and, hence, data did fit on the same regression lines. In contrast, linear regressions between  $E$  and  $Lp_r$  showed a significantly positive response in Grenache, but no response in Syrah (Fig.

8c). Interestingly,  $Lp_r$  remained stable in Syrah despite changes in  $E. Lp_r$  in Syrah was at all times similar to  $Lp_r$  in water deficit or ABA treated vines of Grenache.

A heatmap of relative gene expression for selected root and leaf AQP genes shows the  $\text{Log}_2$  expression ratio relative to well-watered controls (Fig. 9). Most of the genes measured were down-regulated during water deficit, ABA treatment, and also recovery. The strongest down-regulation was measured for *TIP2;1* in roots of Syrah under WD (Fig. 9b). Only *TIP1;1* was consistently up-regulated in water deficit relative to well-watered vines (Fig. 9). In most cases, gene expression was similarly regulated by water deficit and ABA treatment.

## DISCUSSION

Isohydic behaviour of plants under water deficit is characterized by a limited decline in  $\Psi_{\text{leaf}}$  by closure of stomata, while anisohydric behaviour is characterized by maintenance of high  $g_s$  and consequently a greater reduction in  $\Psi_{\text{leaf}}$ . There is much interest in these different behaviours since agriculturally important plants with different degrees of isohydry/anisohydry can have very different water demands under certain environmental conditions and hence require different management strategies. The hydraulic and gas exchange properties of plants that confer either isohydry or anisohydry are still relatively poorly understood though there is evidence to indicate that the response of  $K_{\text{leaf}}$  to ABA may be a key feature (Coupel-Ledru *et al.*, 2017). In this study, we investigated additional features of the mechanisms that may account for the differences in isohydry by exploring how both, roots and shoot hydraulics, gas exchange, AQP expression and ABA may be involved. We used two *V. vinifera* cultivars, Grenache and Syrah, which have previously been shown to exemplify these differences (Schultz, 2003). Schultz concluded that Grenache was more isohydric than Syrah as a result of stronger control over  $g_s$  and  $K_{\text{leaf}}$ . Grapevine has since served as an important model plant to study iso/anisohydric behaviours and several studies have used the cultivars Grenache and Syrah as models for isohydric and anisohydric behaviour, respectively (Coupel-Ledru *et al.*, 2014, Coupel-Ledru *et al.*, 2017, Gerzon *et al.*, 2015, Prieto *et al.*, 2010, Scharwies & Tyerman, 2016, Schultz, 2003, Soar *et al.*, 2006).

### **Isohydic and anisohydric behaviour and stomatal sensitivity to ABA**

Anisohydric behaviour of Syrah was observed in the present study by the significantly lower  $\Psi_{\text{PD}}$  and  $\Psi_{\text{leaf}}$  on Day 7 of the experiment compared to Grenache (Fig. 2e, h), while both cultivars showed a similar relative  $g_s$  (Fig. 2b). A higher sensitivity of  $g_s$  to changes in  $\Psi_{\text{PD}}$  for Grenache could also be deduced from the correlogram, where  $g_s$  and  $E$  were positively correlated to  $\Psi_{\text{PD}}$  only in Grenache. In contrast,  $g_s$  of Syrah was more sensitive to changes in VPD during the mild water deficit experiment as it was observed from the multiple linear regression (Table 1). In the Schultz (2003) experiment, drought stress resulted in

a range of  $\Psi_{PD}$  comprised of between -0.8 and -1.4 MPa contrasting to the milder and more typical  $\Psi_{PD}$  achieved in the present study of -0.3 and -0.5 MPa.

Interestingly, stomata from the cultivar Grenache showed a higher sensitivity to ABA in the xylem of leaves compared to Syrah (Fig. 7). This fits with a higher sensitivity of  $K_{leaf}$  to ABA fed via the petiole in Grenache compared to Syrah, as observed by Coupel-Ledru *et al.* (2017), although we did not observe a relationship between  $K_{leaf}$  and  $[ABA]_{xylem}$ . Tardieu and Simonneau (1998) suggested that isohydric behaviour could be related to stomatal sensitivity to ABA being modulated by  $\Psi_{leaf}$  or  $E$ , while anisohydric behaviour could be due to a single relationship between  $g_s$  and ABA. They showed that stomata of maize (isohydric) were more sensitive to ABA at lower  $\Psi_{leaf}$ . In a leaf dehydration assay on different grapevine genotypes, Hopper *et al.* (2014) found that leaves of Syrah had a higher water loss rate and lower number of stomata per unit area compared to Grenache, which suggested a lower response of stomata to dehydration in Syrah. However, stomata of Syrah showed a quicker response to ABA fed via the petiole to detached leaves compared to Grenache, which was opposite to that expected (Hopper *et al.*, 2014). This may be explained by the effect of  $\Psi_{leaf}$  on ABA sensitivity in Grenache. Leaves in the assay would have had a water potential approaching zero, since they would be equilibrating to the feeding solution. Therefore, ABA sensitivity may have been at its lowest in Grenache. Exogenous ABA application in the present study, which was done on intact plants, resulted in the same relationship between  $g_s$  and  $[ABA]_{xylem}$  compared to ABA responses generated by the mild water deficit (Fig. 7, square symbols). It is important to note that  $\Psi_{leaf}$  and  $\Psi_{stem}$  were the same with ABA treatment and water deficit for both cultivars (Fig. 2h) indicative of a hydraulic restriction within the plant due to ABA treatment. The down-regulation in response to ABA of several AQPs and the decrease of hydraulic conductances in leaves, root, and whole plant as shown in Fig. 8 (squared symbols) could explain this.

It should also be considered that Grenache may produce more ABA or Syrah could have a higher rate of ABA catabolism. The maximum ABA in the xylem sap of leaves measured during the experiment was higher in Grenache compared to Syrah (Fig. 7). Rossdeutsch *et al.* (2016) found that average ABA

concentrations in the xylem sap of Grenache shoots during drought stress were similar to Syrah shoots, however, they measured significantly higher concentrations of dihydrophaseic acid (DPA), a degradation product of ABA, in Syrah compared to Grenache. This may indicate that Syrah has a higher catabolism of ABA, which may regulate its responsiveness to water deficit, and results of the present study support this hypothesis. We observed that water-stressed Syrah vines had nearly three-fold higher DPA concentration in the xylem sap of leaves compared to WW vines as well as all Grenache vines (data not shown). The higher DPA levels suggest greater cumulative water stress in Syrah compared to Grenache as ABA catabolism results in accumulation of DPA and phaseic acid (PA) over time. The higher ABA sensitivity of stomata we observed in Grenache fits with the hypothesis that isohydric behaviour relates to tighter stomatal regulation, possibly through ABA sensitivity. Future research could aim to test the stomatal sensitivity to ABA in Grenache and Syrah at different  $\Psi_{\text{leaf}}$  to verify the hypothesis by Tardieu and Simonneau (1998).

### **VPD effects on stomatal conductance in well-watered vines**

As previously observed for several woody and herbaceous species (Franks *et al.*, 2007), including grapevines (Prieto *et al.*, 2010, Schultz, 1996, Soar *et al.*, 2006), positive relationships between  $g_s$  and VPD were observed under well-watered conditions for both cultivars. A positive relationship as observed for changes of VPD in the range of 2-3 kPa in this study was also shown by Rogiers *et al.* (2011). For higher values of VPD, a negative effect on  $g_s$  should be expected under WD conditions. VPD has been reported to be one of the main sources of variation in  $g_s$  in grapevines (Schultz & Stoll, 2010). However, it is not known which mechanisms (passive feedback, active feedback, feedforward, or some combination of these) coordinate  $g_s$  and leaf water balance when changes in  $\Psi_{\text{leaf}}$  are solely due to VPD (Buckley, 2005, Bunce, 1997, Franks *et al.*, 2007, Jones, 1998, Monteith, 1995). The response of  $g_s$  to VPD seems to differ between field or laboratory experiments, and between isohydric and anisohydric plants (Novick *et al.*, 2016, Tardieu & Simonneau, 1998). VPD and consequently,  $E$ , is usually higher in the field (than indoors), where a 'midday depression' of  $g_s$  is traditionally attributed to high VPD (Chaves *et al.*, 2010,

Correia *et al.*, 1995). Such decrease in  $g_s$  during the afternoon was mostly observed when plants were under mild water deficit, particularly isohydric plants (Bunce, 1997, Tardieu & Simonneau, 1998). In contrast to our observations on Syrah,  $g_s$  of anisohydric species were reported to be similar in the morning and afternoon regardless of VPD suggesting no direct effect of VPD on stomatal control (Tardieu & Simonneau, 1998). Based on a study on the anisohydric cultivar Semillon, Rogiers *et al.* (2012) suggested that stomatal sensitivity to VPD could be higher in dry soils due to the increased levels of ABA. This hypothesis is also supported by results from partial root zone drying in Syrah (Collins *et al.*, 2010). Possibly, VPD effects are dominant in anisohydric cultivars up to a certain point when the soil becomes very dry and stomata then respond more to soil water deficit. Since isohydric cultivars are more sensitive to changes in soil water availability, VPD may have only a significant effect during well-watered conditions. In the present study, we found that both cultivars responded to VPD, but Grenache had a higher  $g_s$  at any given VPD under well-watered conditions and the correlation was less strong than that for Shiraz.

Although  $g_s$  responds to multiple plant signals triggered in general by the environment, hydraulic conductance of the plant plays a key role in the response of  $g_s$  to changes in leaf water relations (Sperry *et al.*, 2002). In our experiment,  $K_{leaf}$  from both cultivars and  $K_{plant}$  in Grenache, responded to VPD but no response was observed for  $Lp_r$ . These observations agree with the findings by Ocheltree *et al.* (2014) who observed that  $K_{leaf}$  but not  $Lp_r$  was correlated to changes in  $E$  caused by changes in VPD. Similarly,  $K_{leaf}$  in *Arabidopsis* increased when the plants were transferred to low humidity conditions, and root AQPs were suggested to play a role in the response (Levin *et al.*, 2007). In our experiment, significant positive correlations were found between the gene expression of *PIP1;1* and *PIP2;2* in roots of Grenache and  $E$ , VPD, and  $K_{plant}$  (Fig. 3a). This may indicate that these AQPs had an influence on  $K_{plant}$  through actions in the root. In Syrah,  $K_{leaf}$  positively correlated with the same two AQP isoforms in roots, but no correlation was found with  $K_{plant}$  or  $Lp_r$ . As proposed by Simonin *et al.* (2015), changes in  $E$  are synchronized with changes in  $K_{leaf}$  to balance the water potential gradient ( $\Psi_{stem} - \Psi_{leaf}$ ). While both cultivars in our study

showed a similar response of  $K_{\text{leaf}}$  to  $E$ , only Grenache showed trends to changes in  $K_{\text{plant}}$  and  $Lp_r$  suggesting that this near-isohydric cultivar had tighter control of its internal hydraulic conductances relative to Syrah. In this respect, a higher  $Lp_r$  could minimize the water potential gradient from soil to leaf ( $\Psi_{\text{PD}} - \Psi_{\text{leaf}}$ ) at increased VPD, allowing plants to maintain higher rates of  $g_s$  and preventing a decline in  $E$  in response to increasing VPD (Pantin *et al.*, 2013).  $Lp_r$  deserves further investigation for its role in the response of  $E$  at higher values of VPD in both cultivars.

### **Divergent strategies for hydraulic control of plant water relations**

Control of hydraulic conductivities in roots, stems and leaves is believed to be another important aspect of isohydric and anisohydric behaviour. Schultz (2003) suggested differences in  $K_{\text{leaf}}$  between Grenache and Syrah could be the origin of their isohydric and anisohydric behaviour, respectively. In the present study,  $K_{\text{leaf}}$  was higher in Grenache, which could be explained by its larger xylem vessels (Gerzon *et al.*, 2015), compared to Syrah, however, xylem vessel sizes were not measured in this study. Stronger positive correlations between gas exchange parameters and hydraulic conductances in the near-isohydric cultivar Grenache compared to the anisohydric cultivar Syrah suggest that hydraulic pathways inside isohydric plants are more adaptive to changes in  $E$  (Fig. 3b). Significant differences in the response of  $Lp_r$  to changes in  $E$  separated the two cultivars (Fig. 8c), which is an important new finding since little is known about root hydraulics in isohydric and anisohydric cultivars (Lovisolo *et al.*, 2010). Distinct differences in  $Lp_r$  were previously linked to different expression patterns of AQPs hypothesized to result from a xylem-mediated hydraulic signal, possibly from shoots to roots (Vandeleur *et al.*, 2014). The linear regressions between  $E$  and  $Lp_r$  calculated in this study for Grenache were similar to the linear regressions shown by Vandeleur *et al.* (2009). Interestingly, Coupel-Ledru *et al.* (2017) found that  $K_{\text{leaf}}$  of detached leaves fed with solutions of different ABA concentration decreased with increasing ABA concentration in Grenache, but no change in  $K_{\text{leaf}}$  was observed in Syrah. This response is similar to what we observed in roots (Fig. 8c). While  $K_{\text{leaf}}$  in this study showed a significant positive relationship with  $E$  for both cultivars



(Fig. 8a), no significant correlations were found to  $[ABA]_{\text{xylem}}$  (Fig. 3b). Different results may be due to the different behaviour of leaves when detached from the plant.

Simonin *et al.* (2015) suggested that a positive correlation between changes in  $E$  and  $K_{\text{leaf}}$  could help to stabilize the gradient between  $\Psi_{\text{stem}}$  and  $\Psi_{\text{leaf}}$  for hydraulic transport to the leaf. This would cause less variation in  $\Psi_{\text{leaf}}$ , which is a feature of isohydric behaviour, and maximise  $g_s$  and, therefore,  $\text{CO}_2$  uptake for photosynthesis. At the whole plant level, our results showed no significant changes in gradient between  $\Psi_{\text{PD}}$  and  $\Psi_{\text{leaf}}$  in relation to changes in  $E$  for both cultivars despite differences in hydraulic regulation, a behaviour termed 'isohydrodynamic' by Franks *et al.* (2007). Furthermore, considering the correlation between  $\Psi_{\text{PD}}$  and  $\Psi_{\text{leaf}}$  found in our study, both cultivars should be classified as anisohydric as the slope of the relationship between  $\Psi_{\text{PD}}$  and  $E$  was not significantly different. However,  $g_s$  was differently regulated, as shown by the association between  $g_s$  and  $\Psi_{\text{PD}}$ , where Grenache had a steeper slope than Syrah. Given that the root and plant hydraulic conductance in Grenache were closely correlated to  $g_s$ , then it is possible to consider an isohydrodynamic behavior in Grenache in which a strong stomatal control maintains relatively constant internal water potential gradients but, at the same time, allows  $\Psi_{\text{leaf}}$  to fluctuate in synchrony with soil water potential. This new perspective of water transport regulation in plants was recently examined in a study where a theoretical framework, based on the relationship between midday and predawn leaf water potentials, is used to characterize the plant responses to drought (Martínez-Vilalta *et al.*, 2014). The continuum between isohydry and anisohydry requires further exploration yet the functional significance and mechanism of both still remains under debate.

The coordination between  $E$  and hydraulic conductances could be important for plants to maintain water potential gradients especially when  $E$  is reduced by low  $g_s$ . It is interesting in this respect how ABA application to roots resulted in lower  $\Psi_{\text{stem}}$  and  $\Psi_{\text{leaf}}$  despite stomatal closure and no soil water deficit. If  $E$  is reduced in response to water deficit, e.g. through a reduction of  $g_s$ , and hydraulic conductances from the soil to the leaves remain constant, the gradient for water flow (i.e.  $\Psi_{\text{PD}} - \Psi_{\text{leaf}}$ ) would decrease. Since isohydric grapevine cultivars like Grenache have a more sensitive stomatal regulation to water deficit, the

mechanism of decreasing hydraulic conductance with decreasing  $E$  could be more important. In contrast, decreasing hydraulic conductance in anisohydric plants like Syrah, which maintain a higher  $g_s$  and  $E$ , would cause a stronger drop in  $\Psi_{\text{leaf}}$ .

Aquaporins could play a major role in the regulation of hydraulic conductances. As suggested by Vandeleur *et al.* (2014), AQPs are most likely involved in the regulation of  $Lp_r$  in response to changes in  $E$ , which was explained by shoot-to-root signaling (Vandeleur *et al.*, 2014). Pou *et al.* (2013) found that in grapevine expression of leaf *TIP2;1* was well-correlated to changes in  $g_s$  during drought and rehydration. In this study, we also found that *TIP2;1* and *PIP2;2* were positively correlated to  $E$  and  $g_s$  in roots and leaves of the cultivar Grenache, but not in Syrah (Fig. 3b). The same AQPs were also positively correlated to  $K_{\text{plant}}$ , but not to  $K_{\text{leaf}}$  or  $Lp_r$ . This difference between Grenache and Syrah could explain different responses in hydraulic conductance to changes in  $E$ . It was surprising that no correlation was found between  $K_{\text{leaf}}$  and  $Lp_r$ , but there may be other factors that influence this relationship. Clearly, expression of most genes in this study was down-regulated during drought and even ABA treatment (Fig. 9). The down-regulation in response to ABA could explain the decrease of hydraulic conductance in leaves, roots, and whole plant as shown in Fig. 8 (squared symbols). Contrary to our hypothesis, relative gene expression of AQP isoforms in this study was similar between both cultivars (Fig. 9). Therefore, stronger hydraulic control in Grenache could not be explained by stronger regulation of AQP transcripts. However, more significant correlations between AQP gene expression,  $E$ , and  $K_{\text{plant}}$  in Grenache could indicate that AQPs were more relevant in this cultivar. Overexpression of *SITIP2;2* in tomato resulted in higher  $E$  in mutant plants and made them more anisohydric (Sade *et al.*, 2009). The authors suggested that increased membrane permeability for water, i.e. increased hydraulic conductance, could be the cause for the observed increase in  $E$ . Pantin *et al.* (2013) proposed a hydraulic feed-forward signal for stomatal regulation, which could be mediated by AQPs, as shown by Shatil-Cohen *et al.* (2011). According to their research, AQPs would modulate  $K_{\text{leaf}}$ , e.g. via the bundle sheath-mesophyll-continuum, which would send a feed-forward signal to stomata. Hence, two different hypotheses exist for the

connection between  $E$  and hydraulic conductance. Either (i) changes in  $E$  affect hydraulic conductance through the function of AQPs, or, (ii) a hydraulic feed-forward signal mediated by AQPs affects  $g_s$ . In the first case, different stomatal behaviour between isohydric and anisohydric plants could require alternative hydraulic regulation via AQPs. In the second case, alternative hydraulic regulation by AQPs, potentially via ABA, could affect the isohydric and anisohydric behaviour through feed-forward signaling to stomata. Future research could aim to understand which model is more likely.

## **ACKNOWLEDGMENTS**

We would like to thank Trevor Garnett (Plant Accelerator) for support with the DroughtSpotter, and Everard Edwards and Annette Boettcher (CSIRO) for assistance with the ABA analysis. This study was carried out with financial support to Silvina Dayer from the Department of Education of the Australian Government through an Endeavour Research Fellowship and from the Australian Research Council Centre of Excellence in Plant Energy Biology (CE140100008).

## REFERENCES

- Aphalo P.J. & Jarvis P.G. (1991) Do stomata respond to relative humidity? *Plant, Cell & Environment*, **14**, 127-132.
- Aroca R., Ferrante A., Vernieri P. & Chrispeels M.J. (2006) Drought, abscisic acid and transpiration rate effects on the regulation of PIP aquaporin gene expression and abundance in *Phaseolus vulgaris* plants. *Annals of Botany*, **98**, 1301-1310.
- Buckley T.N. (2005) The control of stomata by water balance. *New Phytologist*, **168**, 275-292.
- Bunce J.A. (1997) Does transpiration control stomatal responses to water vapour pressure deficit? *Plant, Cell & Environment*, **20**, 131-135.
- Chaumont F. & Tyerman S.D. (2014) Aquaporins: highly regulated channels controlling plant water relations. *Plant Physiology*, **164**, 1600-1618.
- Chaves M.M., Zarrouk O., Francisco R., Costa J.M., Santos T., Regalado A.P., Rodrigues M.L. & Lopes C.M. (2010) Grapevine under deficit irrigation: hints from physiological and molecular data. *Annals of Botany*, **105**, 661-676.
- Christmann A., Weiler E.W., Steudle E. & Grill E. (2007) A hydraulic signal in root-to-shoot signalling of water shortage. *The Plant Journal*, **52**, 167-174.
- Collins M.J., Fuentes S. & Barlow E.W.R. (2010) Partial rootzone drying and deficit irrigation increase stomatal sensitivity to vapour pressure deficit in anisohydric grapevines. *Functional Plant Biology*, **37**, 128-138.
- Comstock J.P. (2002) Hydraulic and chemical signalling in the control of stomatal conductance and transpiration. *Journal of Experimental Botany*, **53**, 195-200.
- Correia M.J., Pereira J.S., Chaves M.M., Rodrigues M.L. & Pacheco C.A. (1995) ABA xylem concentrations determine maximum daily leaf conductance of field-grown *Vitis vinifera* L. plants. *Plant, Cell & Environment*, **18**, 511-521.

- CoupeL-Ledru A., Lebon É., Christophe A., Doligez A., Cabrera-Bosquet L., Péchier P., Hamard P., This P. & Simonneau T. (2014) Genetic variation in a grapevine progeny (*Vitis vinifera* L. cvs Grenache×Syrah) reveals inconsistencies between maintenance of daytime leaf water potential and response of transpiration rate under drought. *Journal of Experimental Botany*, **65**, 6205-6218.
- CoupeL-Ledru A., Tyerman S., Masclef D., Lebon E., Christophe A., Edwards E.J. & Simonneau T. (2017) Abscisic acid down-regulates hydraulic conductance of grapevine leaves in isohydric genotypes only. *Plant Physiology*, Epub. DOI: <https://doi.org/10.1104/pp.17.00698>
- DeGaris K.A. (2016) *Direct and indirect influences of water deficit on salt uptake, ion accumulation and root-shoot interactions of grapevines*, The University of Adelaide.
- Dodd I.C. (2005) Root-to-shoot signalling: Assessing the roles of 'up' in the up and down world of long-distance signalling in plants. *Plant and Soil*, **274**, 251-270.
- Flexas J., Scoffoni C., Gago J. & Sack L. (2013) Leaf mesophyll conductance and leaf hydraulic conductance: an introduction to their measurement and coordination. *Journal of Experimental Botany*, **64**, 3965-3981.
- Franks P.J., Drake P.L. & Froend R.H. (2007) Anisohydric but isohydrodynamic: seasonally constant plant water potential gradient explained by a stomatal control mechanism incorporating variable plant hydraulic conductance. *Plant, Cell & Environment*, **30**, 19-30.
- Galmes J., Pou A., Alsina M.M., Tomas M., Medrano H. & Flexas J. (2007) Aquaporin expression in response to different water stress intensities and recovery in Richter-110 (*Vitis* sp.): relationship with ecophysiological status. *Planta*, **226**, 671-681.
- Gerzon E., Biton I., Yaniv Y., Zemach H., Netzer Y., Schwartz A., Fait A. & Ben-Ari G. (2015) Grapevine anatomy as a possible determinant of isohydric or anisohydric behavior. *American Journal of Enology and Viticulture*, **66**, 340-347.

- Hellemans J., Mortier G., De Paepe A., Speleman F. & Vandesompele J. (2007) qBase relative quantification framework and software for management and automated analysis of real-time quantitative PCR data. *Genome Biology*, **8**, R19.
- Holbrook N.M., Shashidhar V.R., James R.A. & Munns R. (2002) Stomatal control in tomato with ABA-deficient roots: response of grafted plants to soil drying. *Journal of Experimental Botany*, **53**, 1503-1514.
- Hopper D.W., Ghan R. & Cramer G.R. (2014) A rapid dehydration leaf assay reveals stomatal response differences in grapevine genotypes. *Horticulture Research*, **1**, 2.
- Jones H.G. (1998) Stomatal control of photosynthesis and transpiration. *Journal of Experimental Botany*, **49**, 387-398.
- Kudoyarova G., Veselova S., Hartung W., Farhutdinov R., Veselov D. & Sharipova G. (2011) Involvement of root ABA and hydraulic conductivity in the control of water relations in wheat plants exposed to increased evaporative demand. *Planta*, **233**, 87-94.
- Laur J. & Hacke U.G. (2013) Transpirational demand affects aquaporin expression in poplar roots. *Journal of Experimental Botany*, **64**, 2283-2293.
- Levin M., Lemcoff J.H., Cohen S. & Kapulnik Y. (2007) Low air humidity increases leaf-specific hydraulic conductance of *Arabidopsis thaliana* (L.) Heynh (Brassicaceae). *Journal of Experimental Botany*, **58**, 3711-3718.
- Li G., Boudsocq M., Hem S., Vialaret J., Rossignol M., Maurel C. & Santoni V. (2015) The calcium-dependent protein kinase CPK7 acts on root hydraulic conductivity. *Plant, Cell & Environment*, **38**, 1312-1320.
- Lovisol C., Perrone I., Carra A., Ferrandino A., Flexas J., Medrano H. & Schubert A. (2010) Drought-induced changes in development and function of grapevine (*Vitis* spp.) organs and in their hydraulic and non-hydraulic interactions at the whole-plant level: a physiological and molecular update. *Functional Plant Biology*, **37**, 98-116.

- M T Tyree a. & Sperry J.S. (1989) Vulnerability of xylem to cavitation and embolism. *Annual Review of Plant Physiology and Plant Molecular Biology*, **40**, 19-36.
- Martínez-Vilalta J., Poyatos R., Aguadé D., Retana J. & Mencuccini M. (2014) A new look at water transport regulation in plants. *New Phytologist*, **204**, 105-115.
- Maurel C., Simonneau T. & Sutka M. (2010) The significance of roots as hydraulic rheostats. *Journal of Experimental Botany*, **61**, 3191-3198.
- McAdam S.A.M. & Brodribb T.J. (2016) Linking turgor with ABA biosynthesis: implications for stomatal responses to vapor pressure deficit across land plants. *Plant Physiology*, **171**, 2008-2016.
- Medrano H., Escalona J.M., Bota J., Gulias J. & Flexas J. (2002) Regulation of photosynthesis of C3 plants in response to progressive drought: stomatal conductance as a reference parameter. *Annals of Botany*, **89**, 895-905.
- Mekonnen D.W., Flugge U.I. & Ludewig F. (2016) Gamma-aminobutyric acid depletion affects stomata closure and drought tolerance of *Arabidopsis thaliana*. *Plant Science*, **245**, 25-34.
- Monteith J.L. (1995) A reinterpretation of stomatal responses to humidity. *Plant, Cell & Environment*, **18**, 357-364.
- Nardini A., Tyree M.T. & Salleo S. (2001) Xylem cavitation in the leaf of *Prunus laurocerasus* and its impact on leaf hydraulics. *Plant Physiology*, **125**, 1700-1709.
- Novick K.A., Miniat C.F. & Vose J.M. (2016) Drought limitations to leaf-level gas exchange: results from a model linking stomatal optimization and cohesion–tension theory. *Plant, Cell & Environment*, **39**, 583-596.
- Ocheltree T.W., Nippert J.B. & Prasad P.V.V. (2014) Stomatal responses to changes in vapor pressure deficit reflect tissue-specific differences in hydraulic conductance. *Plant, Cell & Environment*, **37**, 132-139.
- Pantin F., Monnet F., Jannaud D., Costa J.M., Renaud J., Muller B., Simonneau T. & Genty B. (2013) The dual effect of abscisic acid on stomata. *New Phytologist*, **197**, 65-72.



- Parent B., Hachez C., Redondo E., Simonneau T., Chaumont F. & Tardieu F. (2009) Drought and abscisic acid effects on aquaporin content translate into changes in hydraulic conductivity and leaf growth rate: a trans-scale approach. *Plant Physiology*, **149**, 2000-2012.
- Pfaffl M.W. (2001) A new mathematical model for relative quantification in real-time RT-PCR. *Nucleic Acids Research*, **29**, 2002-2007.
- Pou A., Medrano H., Flexas J. & Tyerman S.D. (2013) A putative role for TIP and PIP aquaporins in dynamics of leaf hydraulic and stomatal conductances in grapevine under water stress and re-watering. *Plant, Cell & Environment*, **36**, 828-843.
- Prado K., Boursiac Y., Tournaire-Roux C., Monneuse J.M., Postaire O., Da Ines O., Schaffner A.R., Hem S., Santoni V. & Maurel C. (2013) Regulation of Arabidopsis leaf hydraulics involves light-dependent phosphorylation of aquaporins in veins. *Plant Cell*, **25**, 1029-1039.
- Prado K. & Maurel C. (2013) Regulation of leaf hydraulics: from molecular to whole plant levels. *Frontiers in Plant Science*, **4**, eCollection.
- Prieto J.A., Lebon É. & Ojeda H. (2010) Stomatal behavior of different grapevine cultivars in response to soil water status and air water vapor pressure deficit. *OENO One*, **44**, 9-20.
- Rogiers S.Y., Greer D.H., Hatfield J.M., Hutton R.J., Clarke S.J., Hutchinson P.A. & Somers A. (2012) Stomatal response of an anisohydric grapevine cultivar to evaporative demand, available soil moisture and abscisic acid. *Tree Physiology*, **32**, 249-261.
- Rogiers S.Y., Greer D.H., Hutton R.J. & Clarke S.J. (2011) Transpiration efficiency of the grapevine cv. Semillon is tied to VPD in warm climates. *Annals of Applied Biology*, **158**, 106-114.
- Rosdeusch L., Edwards E., Cookson S.J., Barrieu F., Gambetta G.A., Delrot S. & Ollat N. (2016) ABA-mediated responses to water deficit separate grapevine genotypes by their genetic background. *BMC Plant Biology*, **16**, 91.
- Sack L. & Holbrook N.M. (2006) Leaf hydraulics. *Annual Review of Plant Biology*, **57**, 361-381.

- Sade N., Vinocur B.J., Diber A., Shatil A., Ronen G., Nissan H., Wallach R., Karchi H. & Moshelion M. (2009) Improving plant stress tolerance and yield production: is the tonoplast aquaporin SITIP2;2 a key to isohydric to anisohydric conversion? *New Phytologist*, **181**, 651-661.
- Sakurai-Ishikawa J., Murai-Hatano M., Hayashi H., Ahamed A., Fukushi K., Matsumoto T. & Kitagawa Y. (2011) Transpiration from shoots triggers diurnal changes in root aquaporin expression. *Plant, Cell & Environment*, **34**, 1150-1163.
- Salleo S., Nardini A., Pitt F. & Gullo M.A.L. (2000) Xylem cavitation and hydraulic control of stomatal conductance in Laurel (*Laurus nobilis* L.). *Plant, Cell & Environment*, **23**, 71-79.
- Scharwies J.D. & Tyerman S.D. (2016) Comparison of isohydric and anisohydric *Vitis vinifera* L. cultivars reveals a fine balance between hydraulic resistances, driving forces and transpiration in ripening berries. *Functional Plant Biology*, **44**, 322–336.
- Schultz H.R. (1996) Water relations and photosynthetic responses of two grapevine cultivars of different geographical origin during water stress. *Acta Horticulturae*, 251-266.
- Schultz H.R. (2003) Differences in hydraulic architecture account for near-isohydric and anisohydric behaviour of two field-grown *Vitis vinifera* L. cultivars during drought. *Plant, Cell & Environment*, **26**, 1393-1405.
- Schultz H.R. & Stoll M. (2010) Some critical issues in environmental physiology of grapevines: future challenges and current limitations. *Australian Journal of Grape and Wine Research*, **16**, 4-24.
- Shatil-Cohen A., Attia Z. & Moshelion M. (2011) Bundle-sheath cell regulation of xylem-mesophyll water transport via aquaporins under drought stress: a target of xylem-borne ABA? *The Plant Journal*, **67**, 72-80.
- Shelden M.C. (2008) *A comparison of water stress-induced xylem embolism in two grapevine cultivars, Chardonnay and Grenache, and the role of aquaporins*, University of Adelaide.

- Simonin K.A., Burns E., Choat B., Barbour M.M., Dawson T.E. & Franks P.J. (2015) Increasing leaf hydraulic conductance with transpiration rate minimizes the water potential drawdown from stem to leaf. *Journal of Experimental Botany*, **66**, 1303-1315.
- Soar C.J., Speirs J., Maffei S.M., Penrose A.B., McCarthy M.G. & Loveys B.R. (2006) Grape vine varieties Shiraz and Grenache differ in their stomatal response to VPD: apparent links with ABA physiology and gene expression in leaf tissue. *Australian Journal of Grape and Wine Research*, **12**, 2-12.
- Speirs J., Binney A., Collins M., Edwards E. & Loveys B. (2013) Expression of ABA synthesis and metabolism genes under different irrigation strategies and atmospheric VPDs is associated with stomatal conductance in grapevine (*Vitis vinifera* L. cv Cabernet Sauvignon). *Journal of Experimental Botany*, **64**, 1907-1916.
- Sperry J.S., Hacke U.G., Oren R. & Comstock J.P. (2002) Water deficits and hydraulic limits to leaf water supply. *Plant, Cell & Environment*, **25**, 251-263.
- Stedle E. (2000) Water uptake by plant roots: an integration of views. *Plant and Soil*, **226**, 45-56.
- Tardieu F., Lafarge T. & Simonneau T. (1996) Stomatal control by fed or endogenous xylem ABA in sunflower: interpretation of correlations between leaf water potential and stomatal conductance in anisohydric species. *Plant, Cell & Environment*, **19**, 75-84.
- Tardieu F. & Simonneau T. (1998) Variability among species of stomatal control under fluctuating soil water status and evaporative demand: modelling isohydric and anisohydric behaviours. *Journal of Experimental Botany*, **49**, 419-432.
- Tashiro R.M., Philips J.G. & Winefield C.S. (2016) Identification of suitable grapevine reference genes for qRT-PCR derived from heterologous species. *Molecular Genetics and Genomics*, **291**, 483-492.
- Thompson A.J., Andrews J., Mulholland B.J., McKee J.M.T., Hilton H.W., Horridge J.S., Farquhar G.D., Smeeton R.C., Smillie I.R.A., Black C.R. & Taylor I.B. (2007) Overproduction of abscisic acid in

- tomato increases transpiration efficiency and root hydraulic conductivity and influences leaf expansion. *Plant Physiology*, **143**, 1905-1917.
- Tombesi S., Nardini A., Frioni T., Soccolini M., Zadra C., Farinelli D., Poni S. & Palliotti A. (2015) Stomatal closure is induced by hydraulic signals and maintained by ABA in drought-stressed grapevine. *Scientific Reports*, **5**, 12449.
- Tornroth-Horsefield S., Wang Y., Hedfalk K., Johanson U., Karlsson M., Tajkhorshid E., Neutze R. & Kjellbom P. (2006) Structural mechanism of plant aquaporin gating. *Nature*, **439**, 688-694.
- Tournaire-Roux C., Sutka M., Javot H., Gout E., Gerbeau P., Luu D.-T., Bligny R. & Maurel C. (2003) Cytosolic pH regulates root water transport during anoxic stress through gating of aquaporins. *Nature*, **425**, 393-397.
- Vandeleur R.K., Mayo G., Shelden M.C., Gilliam M., Kaiser B.N. & Tyerman S.D. (2009) The role of plasma membrane intrinsic protein aquaporins in water transport through roots: diurnal and drought stress responses reveal different strategies between isohydric and anisohydric cultivars of grapevine. *Plant Physiology*, **149**, 445-460.
- Vandeleur R.K., Sullivan W., Athman A., Jordans C., Gilliam M., Kaiser B.N. & Tyerman S.D. (2014) Rapid shoot-to-root signalling regulates root hydraulic conductance via aquaporins. *Plant, Cell & Environment*, **37**, 520-538.
- Wilkinson S., Bacon M.A. & Davies W.J. (2007) Nitrate signalling to stomata and growing leaves: interactions with soil drying, ABA, and xylem sap pH in maize. *Journal of Experimental Botany*, **58**, 1705-1716.
- Ye J., Coulouris G., Zaretskaya I., Cutcutache I., Rozen S. & Madden T.L. (2012) Primer-BLAST: A tool to design target-specific primers for polymerase chain reaction. *BMC Bioinformatics*, **13**, 134-134.

## TABLES

**Table 1.**

Multiple linear regression model to predict changes in stomatal conductance ( $g_s$ ) in response to environmental changes like vapour pressure deficit ( $VPD_{leaf}$ ) and predawn water potential ( $\Psi_{PD}$ ), which reflects the soil water availability. Model formula =  $g_s \sim VPD_{leaf} + \Psi_{PD}$ . Input: all data pooled from well-watered, water deficit, and recovery vines from the cultivars Grenache and Syrah. The variables  $VPD_{leaf}$  and  $\Psi_{PD}$  were centred before running the multiple linear regression.

|                                | Grenache |            |             | Syrah    |            |             |
|--------------------------------|----------|------------|-------------|----------|------------|-------------|
|                                | Estimate | Std. Error | P value     | Estimate | Std. Error | P value     |
| <b>(Intercept)</b>             | 223.76   | 15.06      | < 0.001 *** | 177.15   | 10.76      | < 0.001 *** |
| <b><math>VPD_{leaf}</math></b> | 16.46    | 74.07      | 0.826       | 85.94    | 40.81      | 0.046 *     |
| <b><math>\Psi_{PD}</math></b>  | 557.36   | 160.06     | 0.002 **    | 84.81    | 107.89     | 0.440       |

## FIGURE LEGENDS

### Figure 1.

Stomatal conductance as measured with a porometer ( $g_s$  Poro; a-c) in Grenache and Syrah grapevines under mild water deficit (WD), exogenous application of abscisic acid (ABA) and recovery from water stress (REC) the days before the sampling days along the experiment on the DroughtSpotter platform. Well-watered (WW) vines were measured at each time point and used as control. The WD vines were first sampled at Day 4 when the desired  $g_s$  value was achieved ( $\sim 50 \text{ mmol H}_2\text{O m}^{-2} \text{ s}^{-1}$ ) and at Day 7 after the stress was sustained for three days. Recovery vines were sampled after seven days of re-watering at WW levels. Values are means  $\pm$  SE ( $n = 5$ ). Different letters indicate statistically significant differences between treatments and cultivars ( $P \leq 0.05$ ) by Fisher's LSD test.

### Figure 2.

Stomatal conductance relative to WW controls measured with the IRGA ( $g_s$ ; a-c), pre-dawn ( $\Psi_{PD}$ ; d-f), leaf ( $\Psi_{leaf}$ ; g-i) and stem ( $\Psi_{stem}$ ; j-l) water potentials in Grenache and Syrah grapevines under mild water deficit (WD), exogenous application of abscisic acid (ABA) and recovery from water stress (REC) at different sampling days along the experiment in an adjacent glasshouse to the DroughtSpotter platform. Values are means  $\pm$  SE ( $n = 5$ ). Different letters indicate statistically significant differences across all treatments and cultivars within the day ( $P \leq 0.05$ ) by Fisher's LSD test.

### Figure 3.

Correlation maps (correlograms) of plant physiological parameters and gene expression in leaves and roots of the cultivars Grenache (upper triangle) and Syrah (lower triangle). (a) Correlations based on data

from well-watered vines (WW) only and (b) correlations based on combined data from well-watered (WW) and mild water deficit (WD) vines. The exogenous ABA treated vines and recovery from mild water deficit (REC) treatments were excluded from the analysis. Only significant Pearson correlations coefficients ( $P \leq 0.05$ ) are shown. Significant positive correlations are shown in blue, while significant negative correlations are shown in red.  $[ABA]_{\text{xylem}}$  was log10 transformed before the analysis. Expression of aquaporin genes measured in leaves are denoted with an “L” (e.g. *PIP1;1* L), while expression in roots are denoted with an “R” (e.g. *PIP1;1* R).

#### Figure 4.

Relationship between stomatal conductance ( $g_s$ ) and  $VPD_{\text{leaf}}$  for well-watered vines (Days 0, 5, 7, 14) during the experiment (both measured with the IRGA). The slopes for both linear regressions are significantly positive ( $P \leq 0.05$ ), but not significantly different between the two cultivars. However, the elevations are significantly different ( $P = 0.0002$ ).

#### Figure 5.

Relationship between  $K_{\text{leaf}}$  and  $E$  for well-watered vines. For both cultivars, the points fall on the same line. In Grenache, this positive correlation is significant ( $r = 0.65$ ,  $P = 0.030$ ) while in Syrah it is almost significant ( $r = 0.53$ ,  $P = 0.052$ ). Inset: comparing the mean  $K_{\text{leaf}}$  between the two cultivars showed that Grenache had a significantly higher  $K_{\text{leaf}}$  compared to Syrah ( $P = 0.044$ , Mann-Whitney test).

#### Figure 6.

Relationship between  $\Psi_{\text{PD}}$ ,  $g_s$  and  $\Psi_{\text{leaf}}$  for well-watered (circles) and water deficit (Day 5: triangles up, Day 7: triangles down) vines. a) Grenache and Syrah show a significantly different ( $P = 0.030$ ) relation

between  $\Psi_{PD}$  and  $g_s$ . While in  $g_s$  is significantly positively correlated to  $\Psi_{PD}$  in Grenache ( $r = 0.59$ ,  $P = 0.004$ ), no significant correlation was found for Syrah ( $r = 0.12$ ,  $P = 0.536$ ). b) For both cultivars,  $\Psi_{leaf}$  is significantly positively correlated to  $\Psi_{PD}$  (Grenache:  $r = 0.62$ ,  $P = 0.002$ ; Syrah:  $r = 0.50$ ,  $P = 0.018$ ). No significant differences were found for the slope ( $P = 0.531$ ) and intercept ( $P = 0.146$ ) of the linear regression lines (Grenache:  $\Psi_{leaf} \text{ (MPa)} = 1.5 \pm 0.4 \times \Psi_{PD} \text{ (MPa)} - 0.3 \pm 0.1$ ; Syrah:  $\Psi_{leaf} \text{ (MPa)} = 1.2 \pm 0.4 \times \Psi_{PD} \text{ (MPa)} - 0.5 \pm 0.1$ ). Linear regression lines with a slope of 1 and y-intercept of zero (blue solid line) and slope of 0 and y-intercept of -0.6 (red solid line), which equals the mean  $\Psi_{leaf}$  of well-watered Grenache vines, are shown as reference.

### Figure 7.

Relationship between  $[ABA]_{xylem}$  and  $g_s$  measured for well-watered (circles), water deficit (Day 5: triangles up, Day 7: triangles down), and ABA treated vines (squares) from the cultivars Grenache (open symbols) and Syrah (filled symbols). A significant slope ( $P < 0.001$ ) was predicted for Grenache, while the slope for Syrah was not significant ( $P = 0.069$ ). Significant negative regressions were predicted for Grenache ( $g_s = -166.4 \pm 23.9 \times \log_{10}([ABA]_{xylem}) + 618.7 \pm 63.1$ ;  $P < 0.0001$ ) and Syrah ( $g_s = -53.3 \pm 18.3 \times \log_{10}([ABA]_{xylem}) + 265 \pm 40.7$ ;  $P = 0.009$ ).

### Figure 8.

Relationship between  $E$  and  $K_{leaf}$ ,  $K_{plant}$ , or  $Lp_r$  for well-watered (circles), water deficit (Day 5: triangles up, Day 7: triangles down), and ABA treated vines (squares) from the cultivars Grenache (open symbols) and Syrah (filled symbols). (a)  $K_{leaf}$  was significantly positive correlated to  $E$  for both Grenache ( $K_{leaf} = 3.2 \pm 0.84 \times E + 10.61 \pm 4.41$ ;  $P = 0.0018$ ) and Syrah ( $K_{leaf} = 7.39 \pm 1.76 \times E - 10.07 \pm 7.98$ ;  $P = 0.0005$ ). The slopes were significantly different ( $P = 0.0321$ ). (b)  $K_{plant}$  was positively correlated to  $E$  for both Grenache ( $K_{plant} = 3.45 \pm 0.512 \times E - 2.56 \pm 2.66$ ;  $P < 0.0001$ ) and Syrah ( $K_{plant} = 1.899 \pm 0.5402 \times E +$



$0.2659 \pm 2.448$ ;  $P = 0.0023$ ) as well. The slopes were not significantly different. (c)  $Lp_r$  was significantly positively correlated to  $E$  only in the cultivar Grenache ( $Lp_r = 0.815 \pm 0.2142 \times E - 0.09383 \pm 1.081$ ;  $P = 0.0016$ ), but not in Syrah ( $P = 0.6992$ ).

### Figure 9.

Relative expression of selected aquaporin genes in leaves (a) and roots (b) of water deficit (WD), abscisic acid treated (ABA), and recovery (REC) vines of the cultivars Grenache and Syrah in comparison to well-watered vines.  $\log_2$  ratios are shown as mean of 2 – 5 biological replicates. Missing data are marked with X. Expression ratios of strongly down-regulated genes are shown as numbers on light green background. The double gradient colour legend shows  $\log_2$  ratios from -3.5 to 2.0.

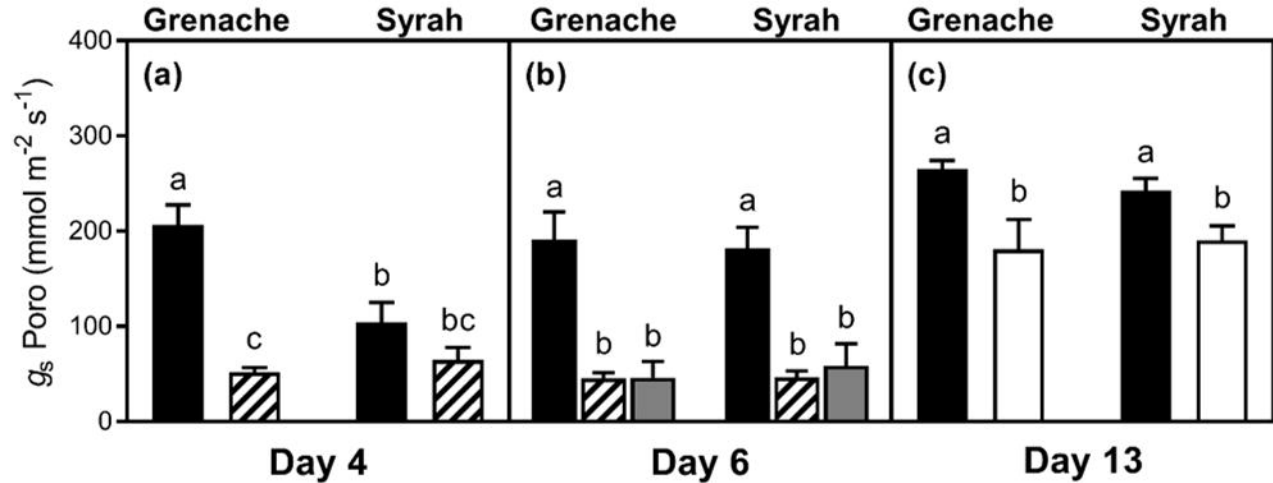

Fig. 1

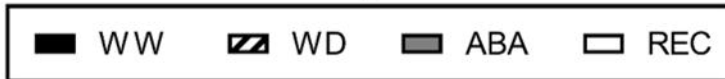

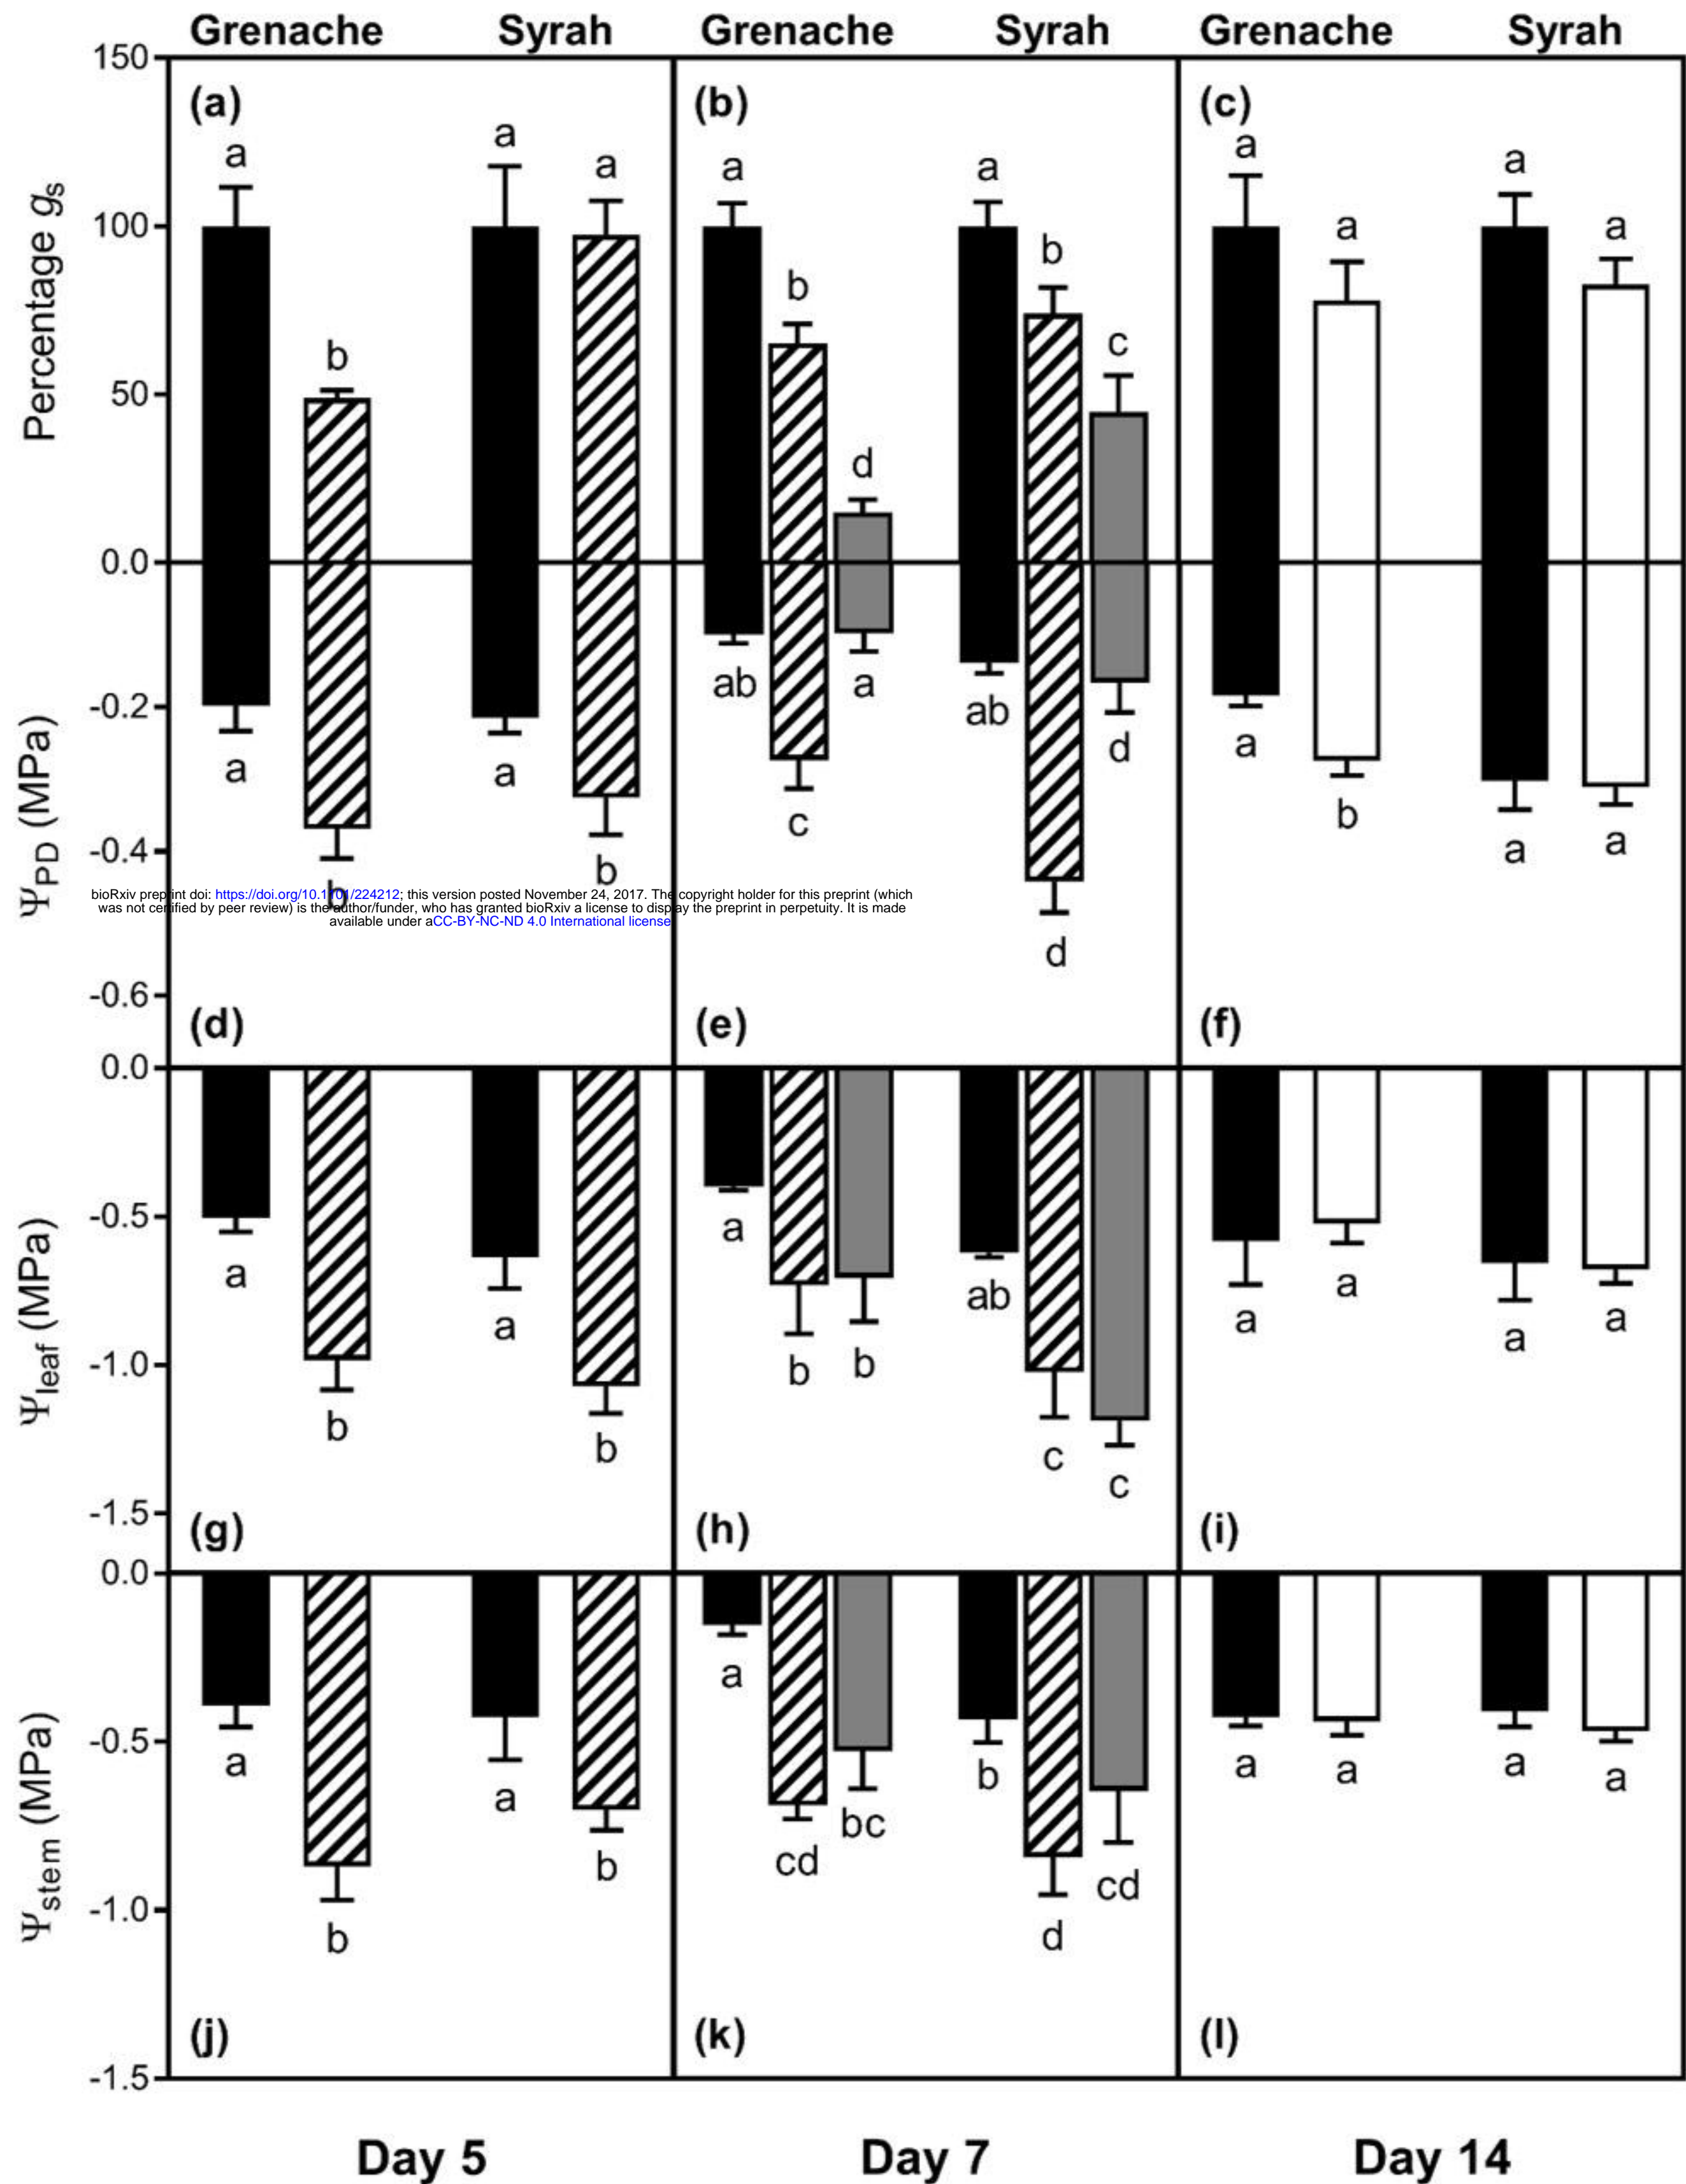

**Fig. 2**

■ WW   ▨ WD   ■ ABA   □ REC

bioRxiv preprint doi: <https://doi.org/10.1101/224212>; this version posted November 24, 2017. The copyright holder for this preprint (which was not certified by peer review) is the author/funder, who has granted bioRxiv a license to display the preprint in perpetuity. It is made available under aCC-BY-NC-ND 4.0 International license.

Pearson Correlation

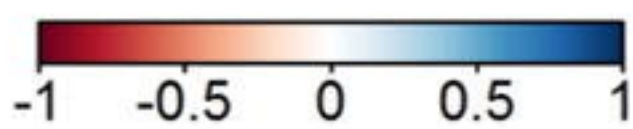

WW vines only

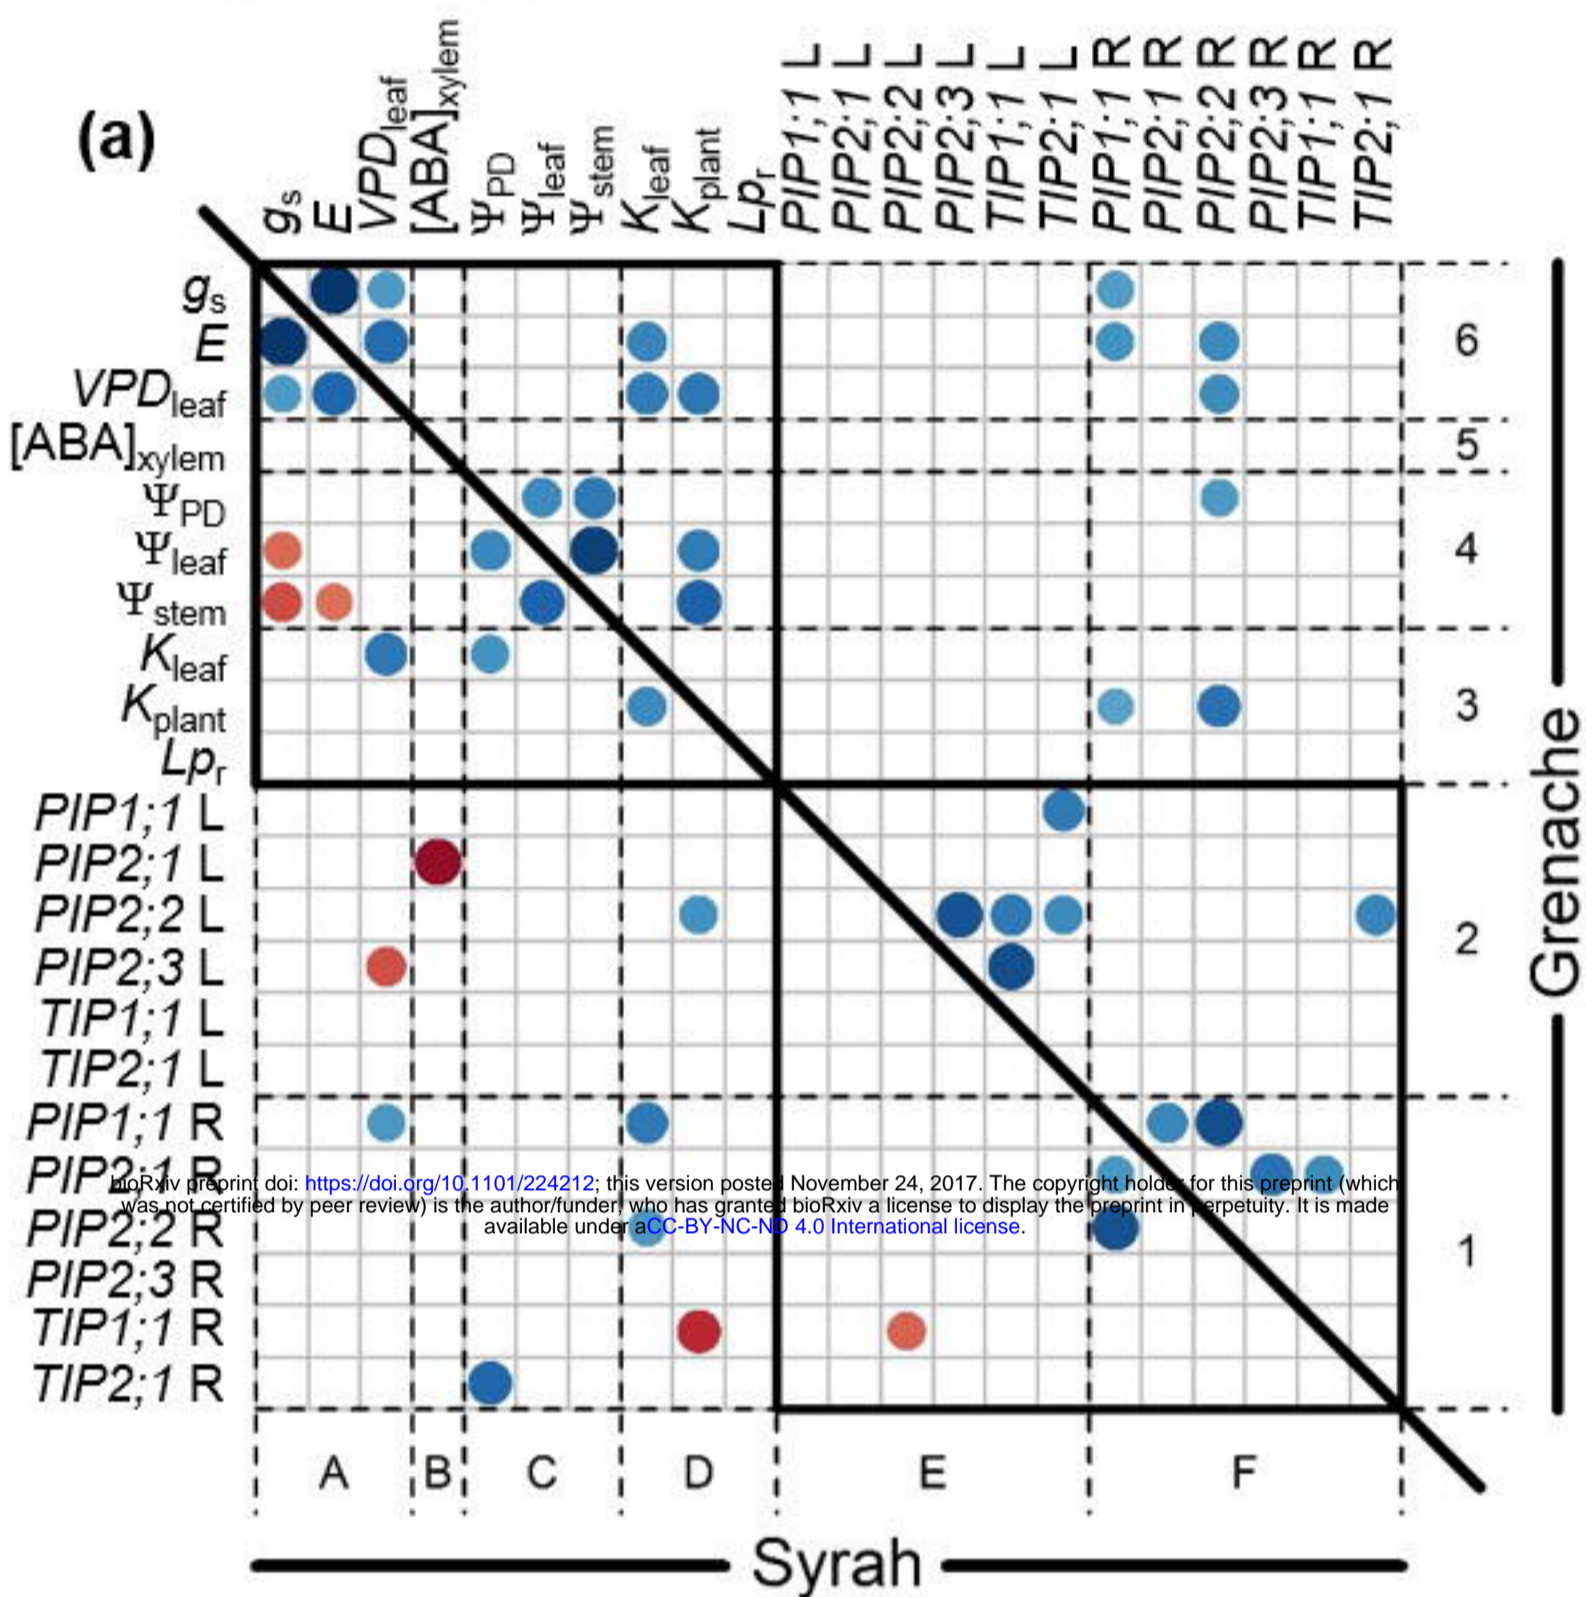

**Fig. 3**

WW and WD vines

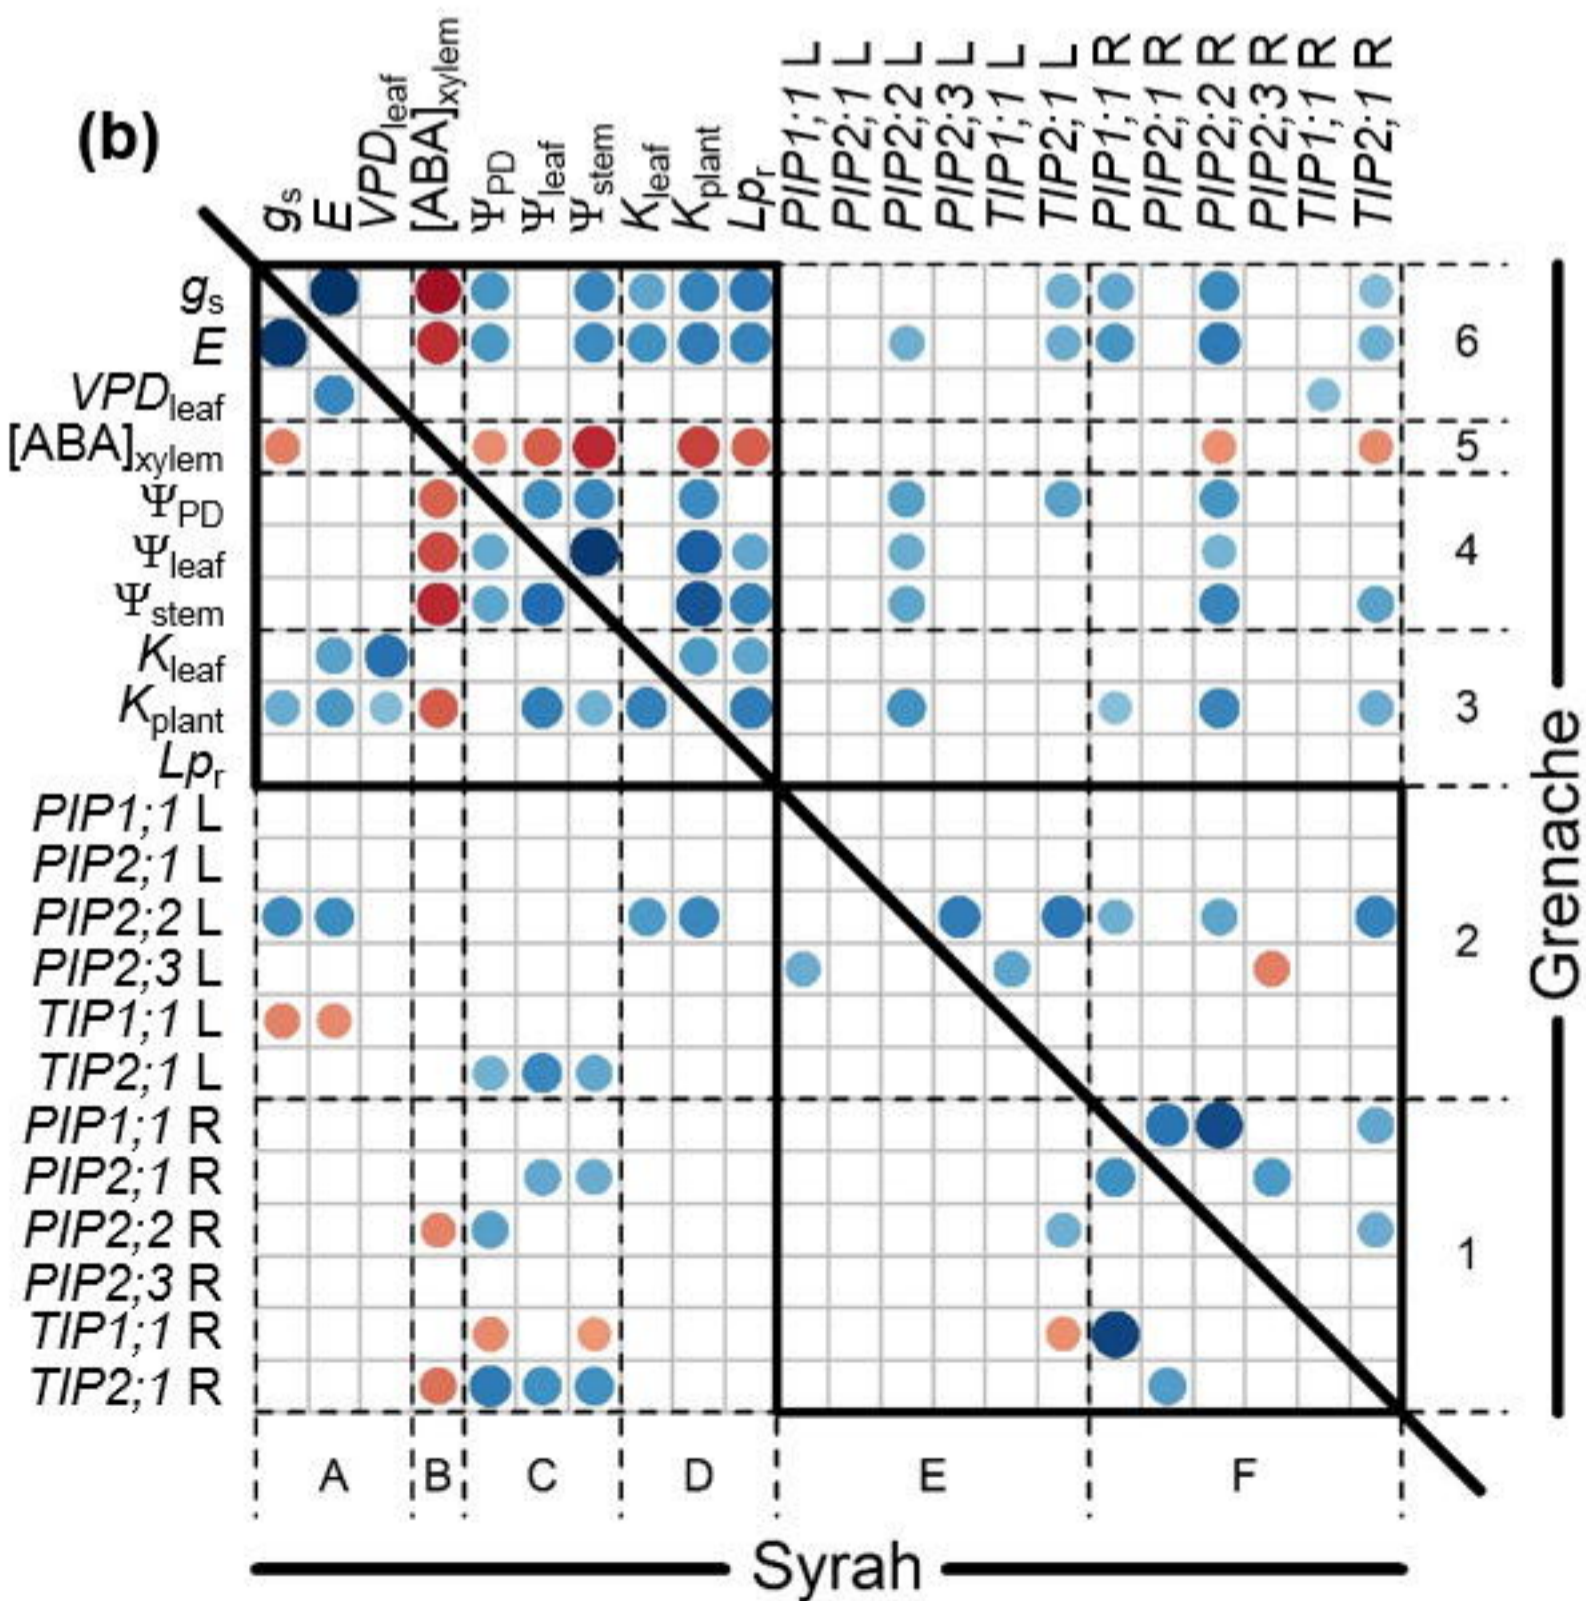

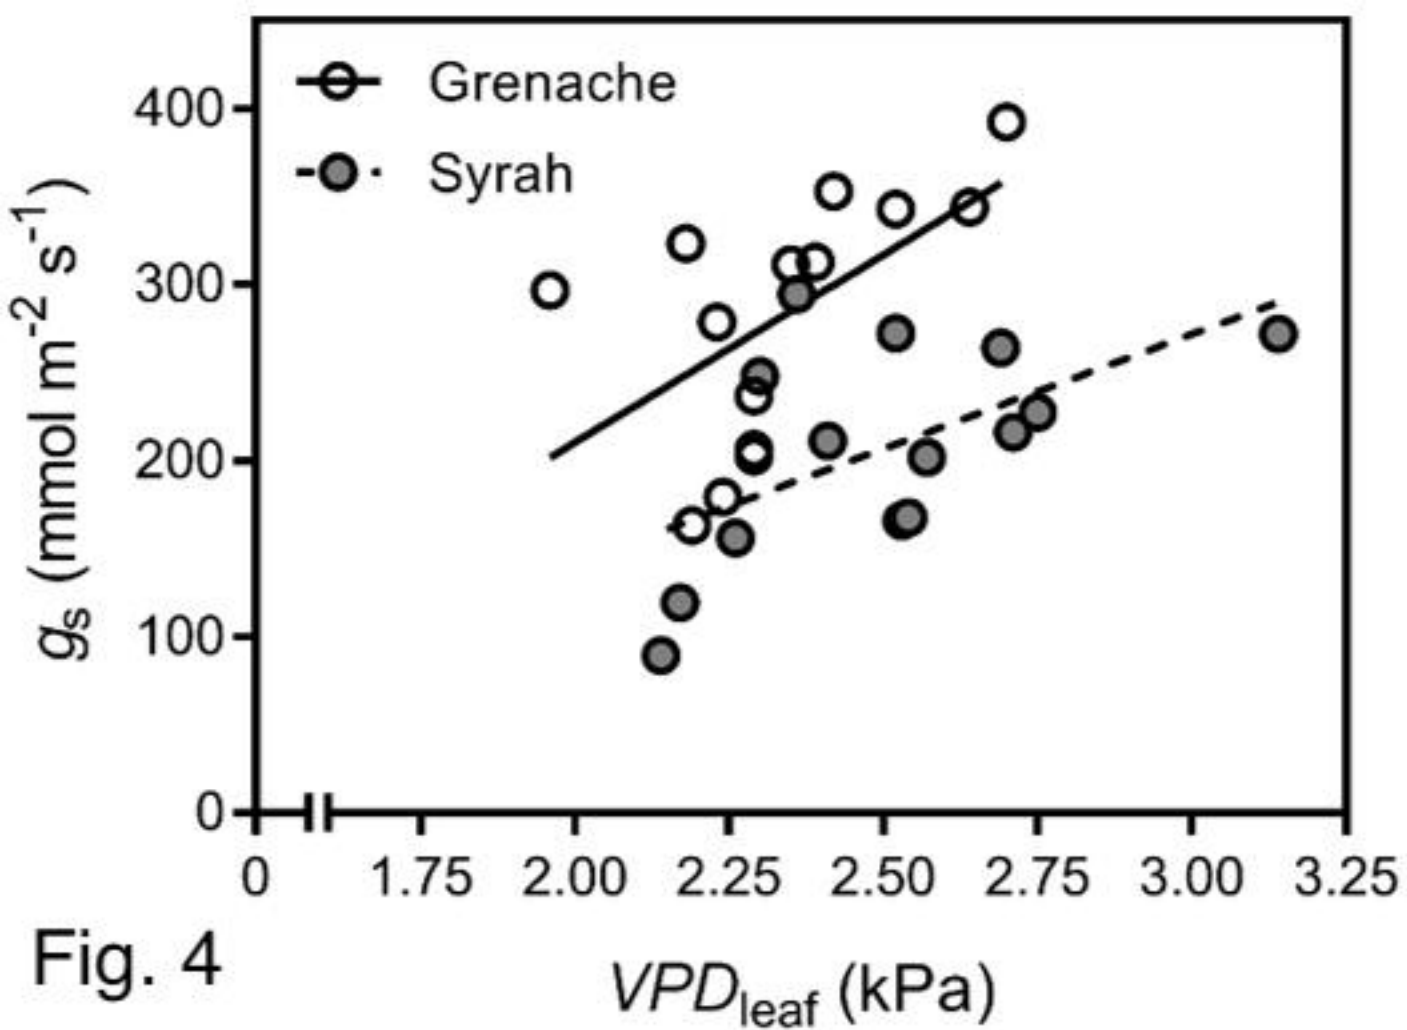

Fig. 4

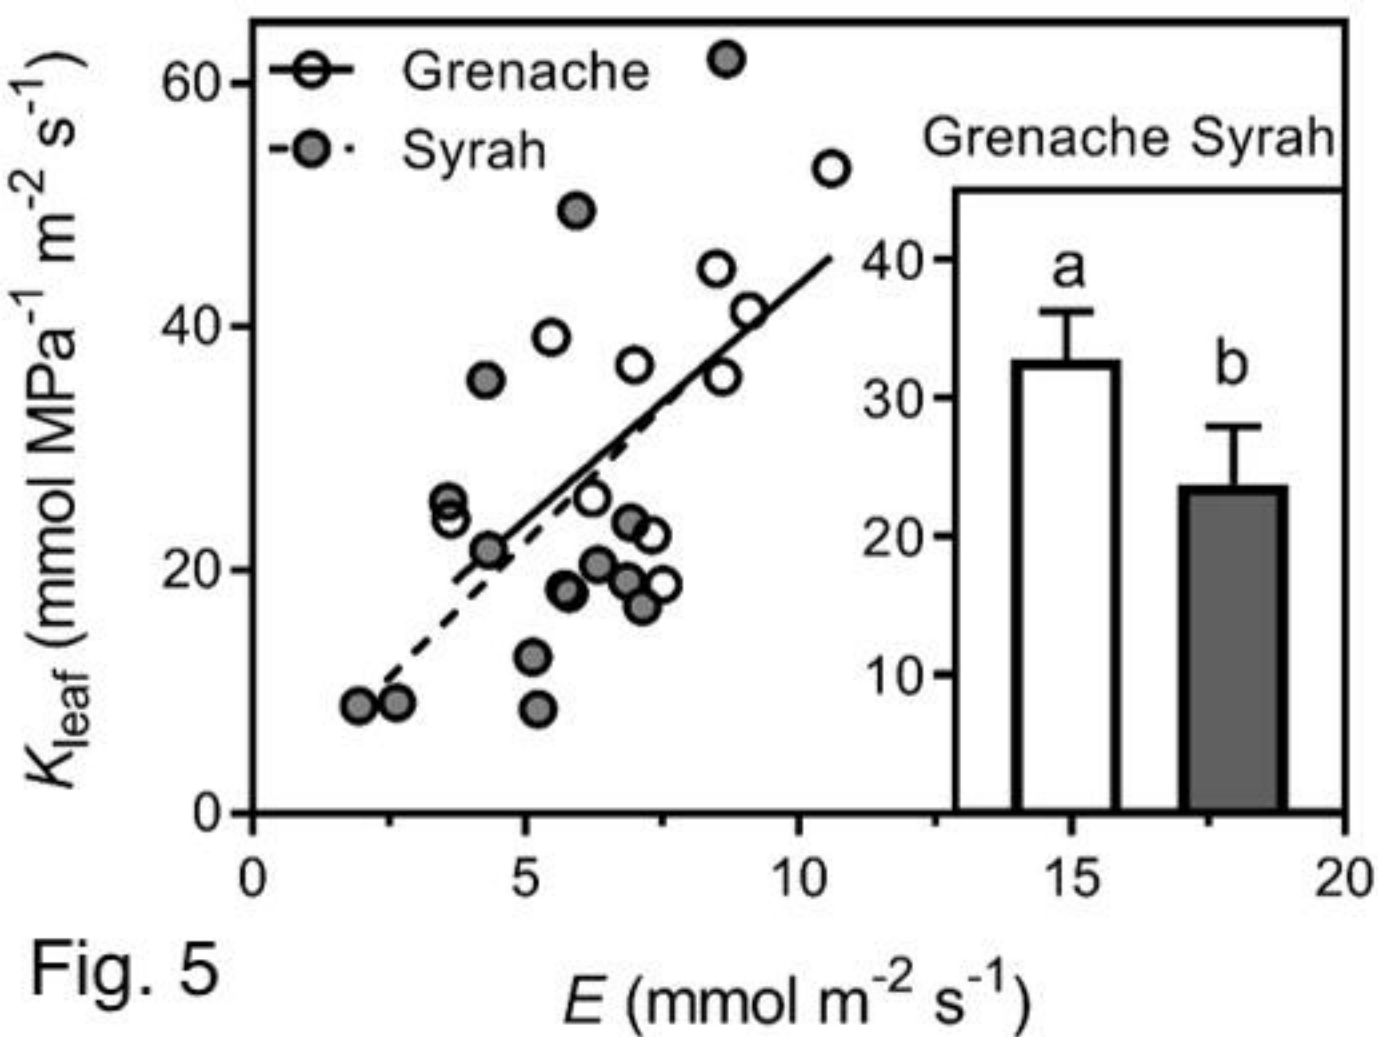

Fig. 5

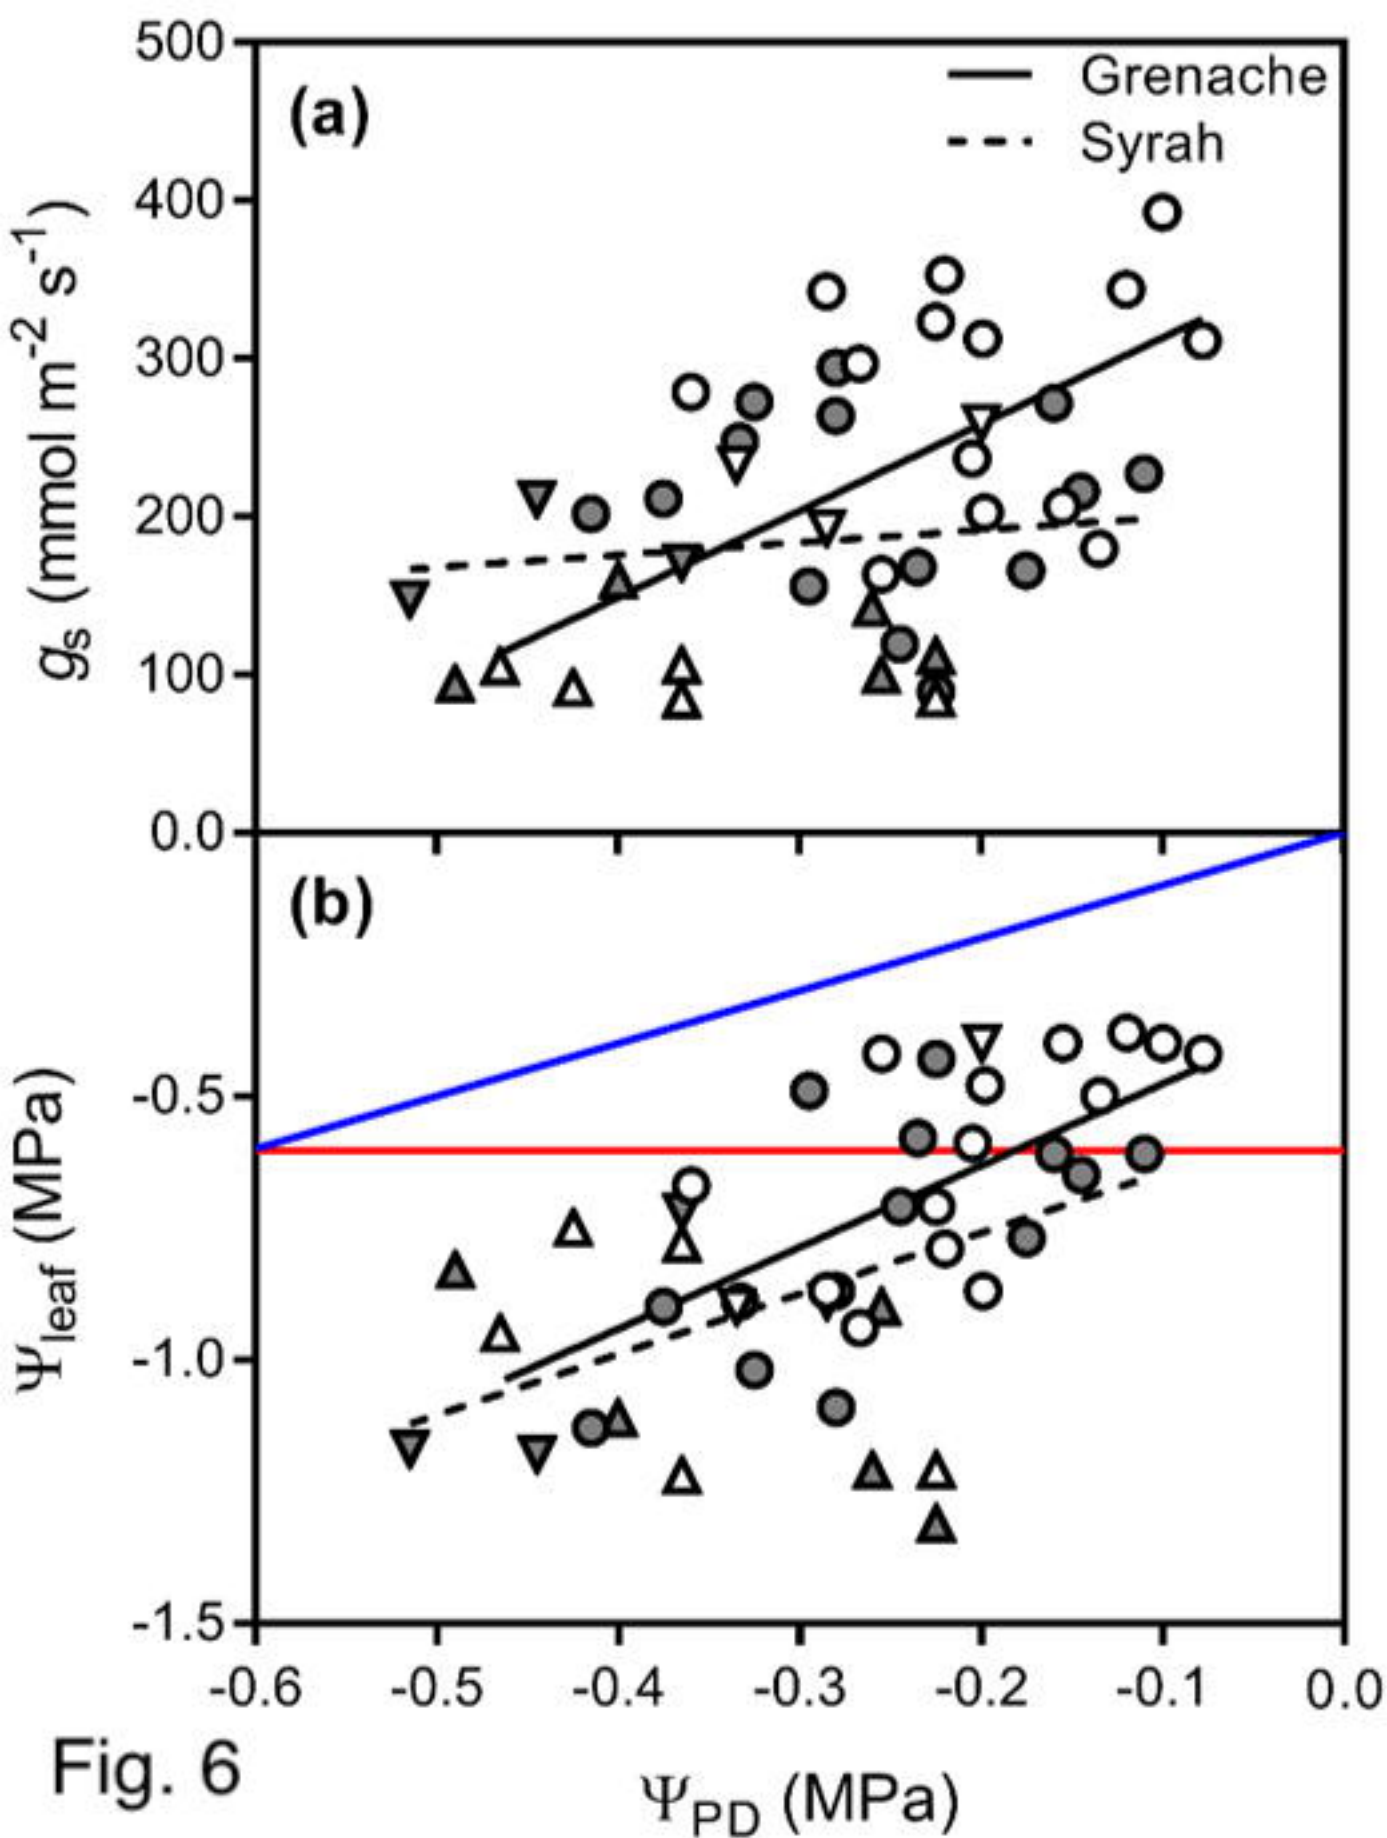

Fig. 6

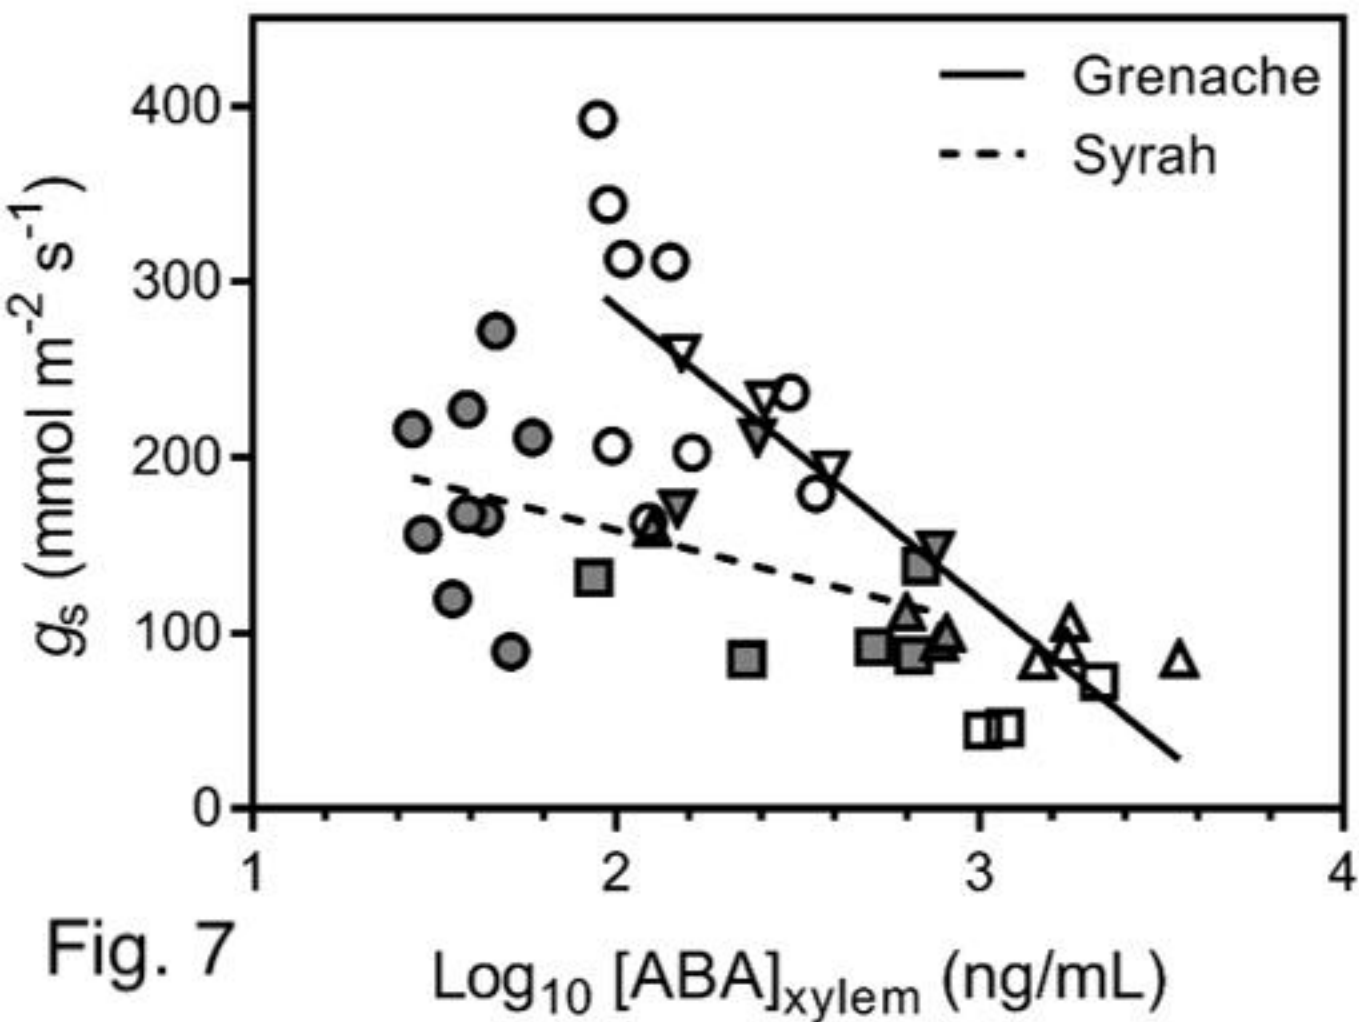

Fig. 7



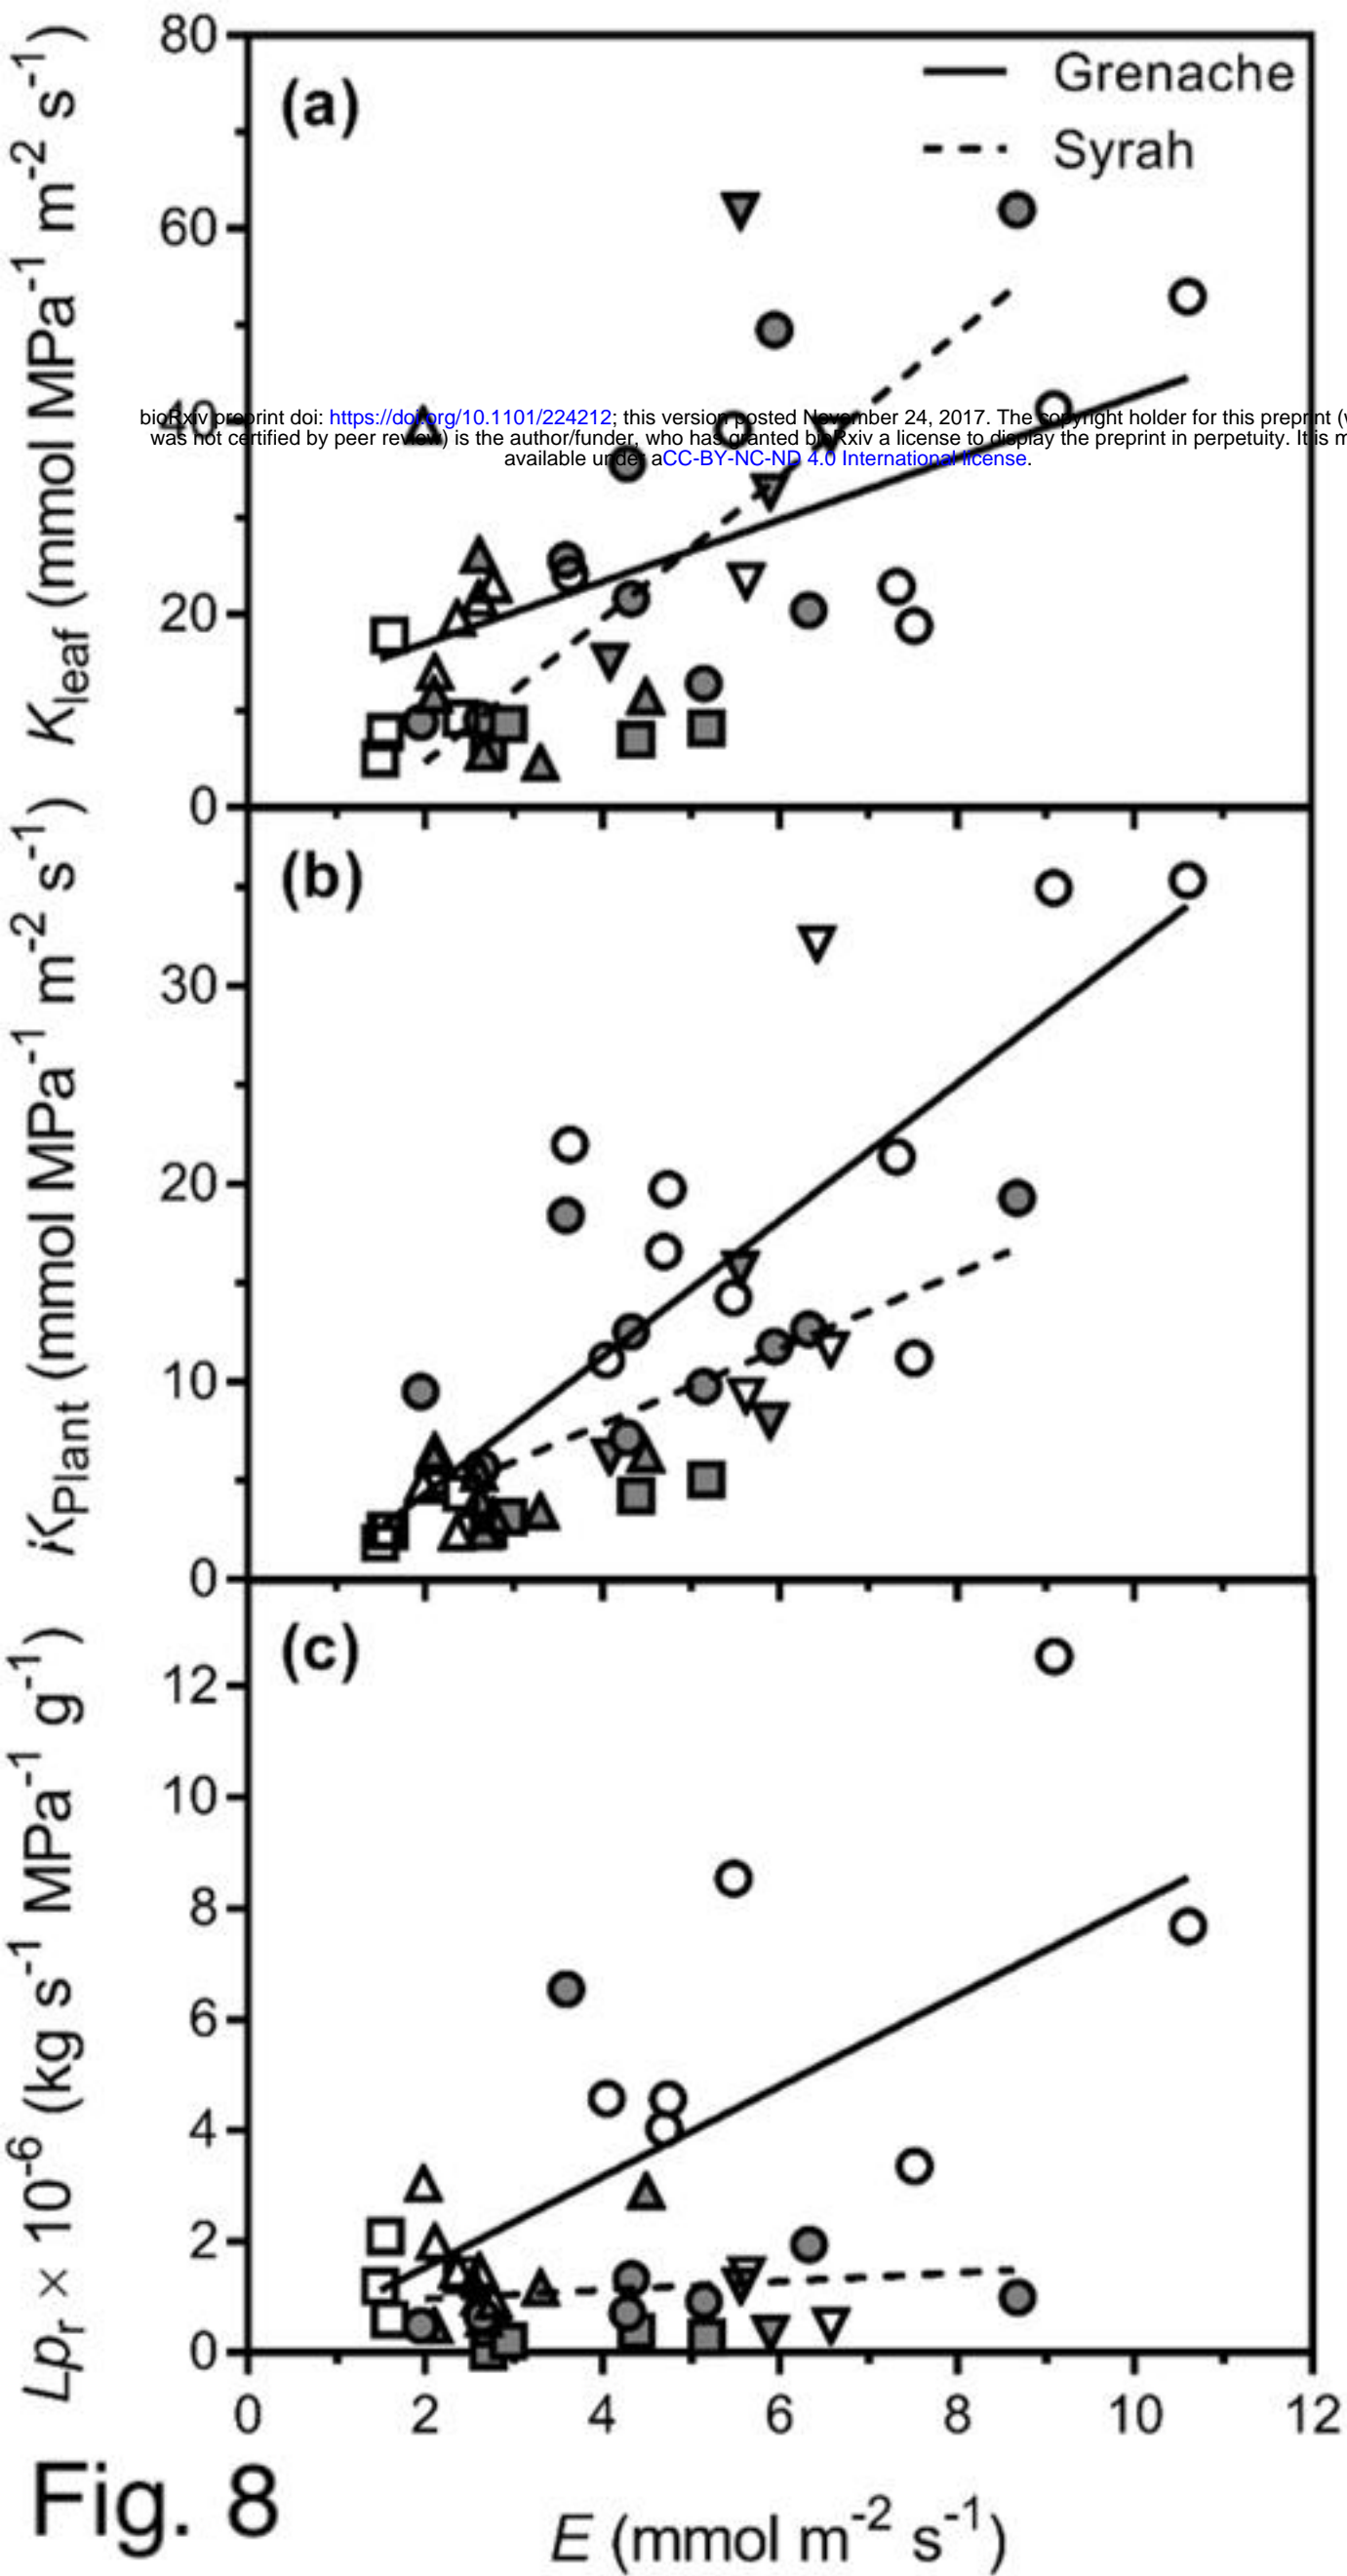

Log<sub>2</sub> ratio

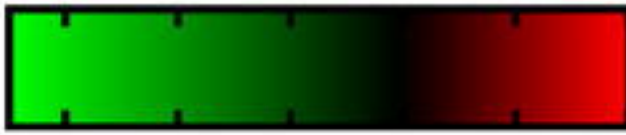

Fig. 9

bioRxiv preprint doi: <https://doi.org/10.1101/224212>; this version posted November 24, 2017. The copyright holder for this preprint (which was not certified by peer review) is the author/funder, who has granted bioRxiv a license to display the preprint in perpetuity. It is made available under aCC-BY-NC-ND 4.0 International license.

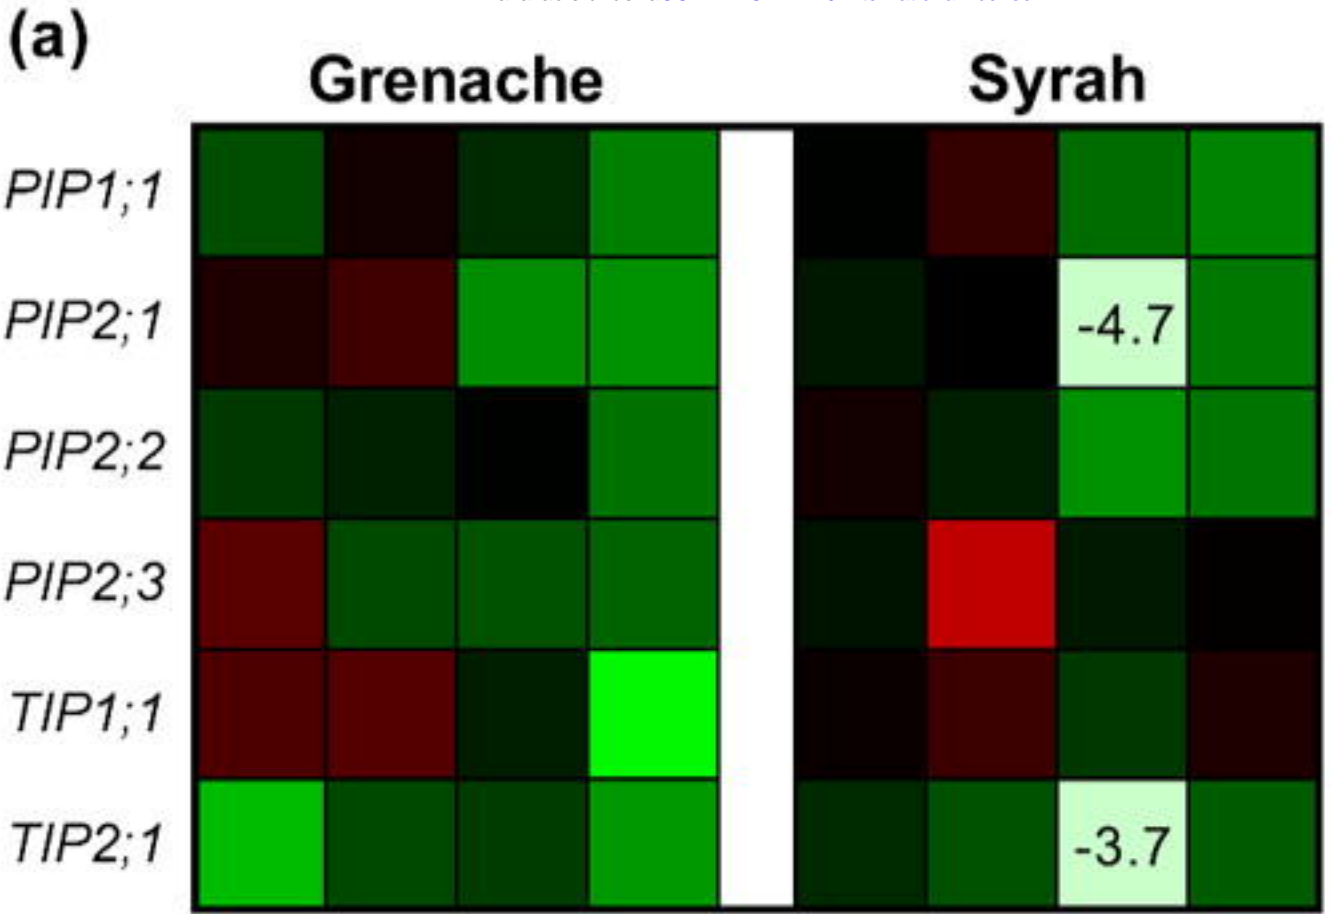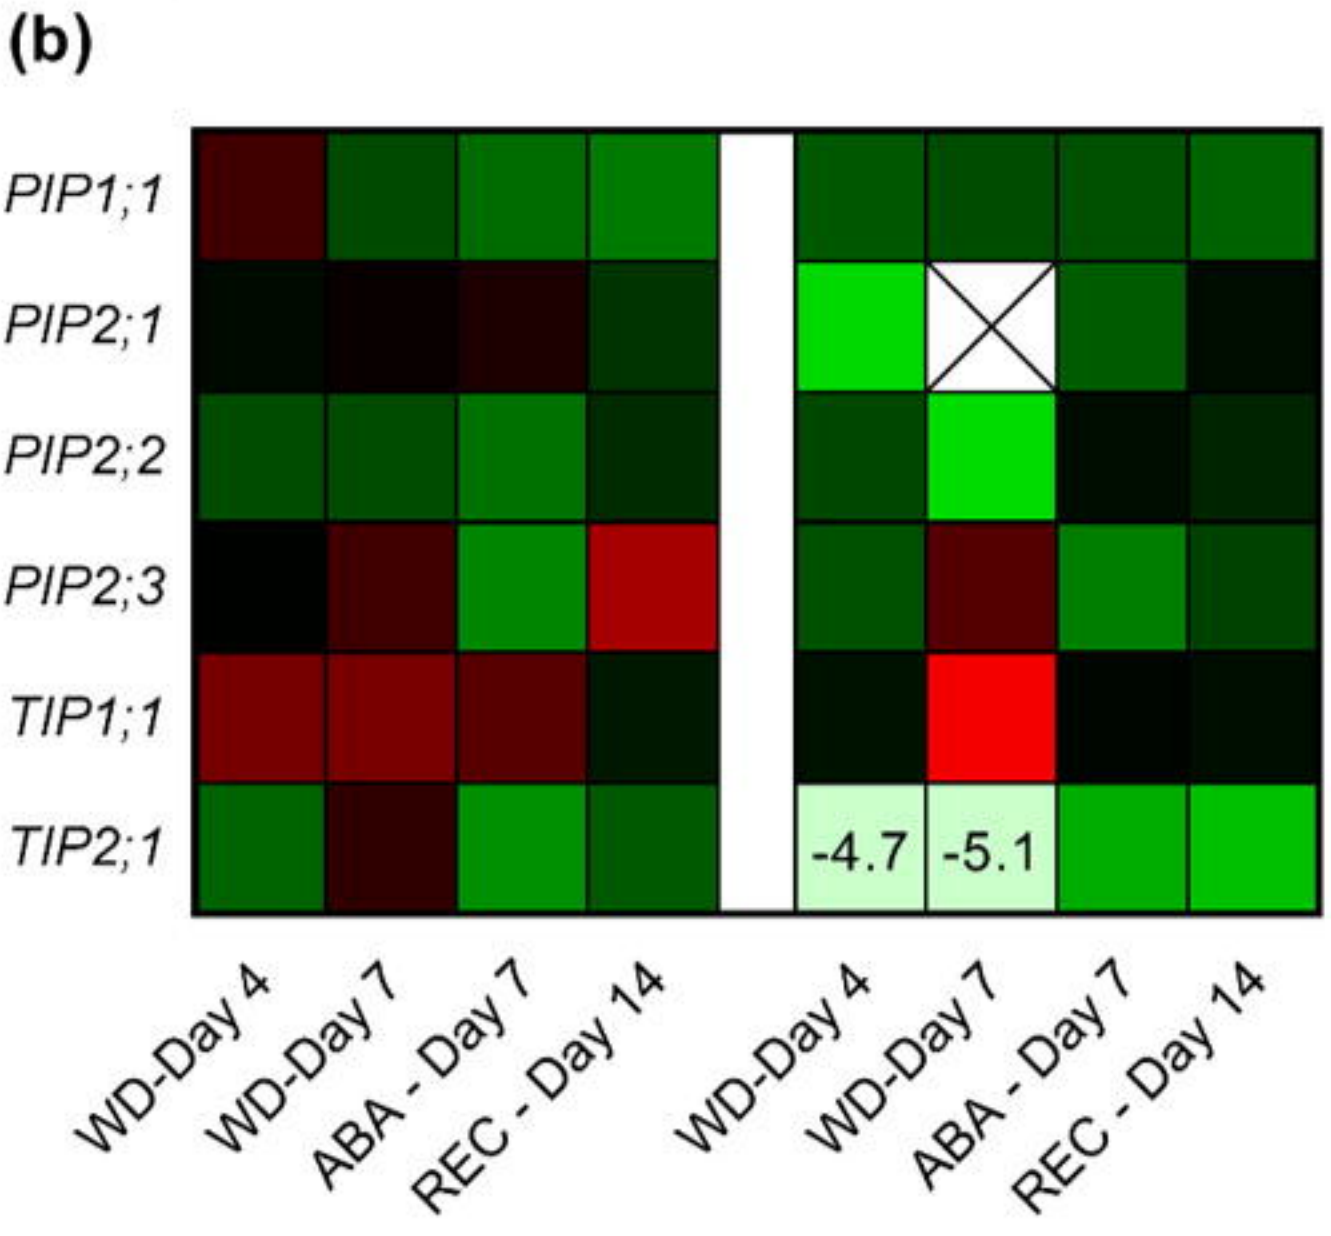

Source: https://www.biorxiv.org/content/10.1101/224212v2.full.pdf
